# Supplementary material for: Condom use and HIV testing among adults in Switzerland: repeated national cross-sectional surveys 2007, 2012, and 2017
Source: PubMed Central journal article supplement (PMC10625239; doi:10.1186/s12889-023-17056-x), 2023-11-03
Supplement: 12889_2023_17056_MOESM1_ESM.pdf [file 12889_2023_17056_MOESM1_ESM.pdf]

**Additional file 1:** Supplementary tables S1-S16

Condom use and HIV testing among adults in Switzerland: repeated  
national cross-sectional surveys 2007, 2012, and 2017

Diana Buitrago-Garcia<sup>1,2</sup>, Georgia Salanti<sup>1</sup>, Nicola Low<sup>1\*</sup>

1. Institute of Social and Preventive Medicine, University of Bern, Bern, Switzerland
2. Graduate School of Health Sciences, University of Bern, Bern, Switzerland

## Table of Contents

|                                                                                                                                                                                                                                                                                                          |    |
|----------------------------------------------------------------------------------------------------------------------------------------------------------------------------------------------------------------------------------------------------------------------------------------------------------|----|
| Table S1. Filtering questions to determine eligible respondents to questions about condom use at last intercourse and HIV testing, according to survey year.....                                                                                                                                         | 3  |
| Table S2. Type of partner in men and women reporting any same-sex partner 2007,2012,2017.....                                                                                                                                                                                                            | 3  |
| Table S3. Condom use at last sexual intercourse, men and women with only opposite-sex partners. Denominators, unweighted and weighted, for each survey and variable.....                                                                                                                                 | 4  |
| Table S4. Condom use, men and women reporting only opposite-sex partners, 2007. Prevalence and associations with sociodemographic factors, sexual behaviours and substance use.....                                                                                                                      | 7  |
| Table S5. Condom use, men and women reporting only opposite-sex partners, 2012,2017. Prevalence and associations with sociodemographic factors, sexual behaviours, and substance use .....                                                                                                               | 9  |
| Table S6. Condom use at last sexual intercourse, men and women with any same-sex partners. Denominators, unweighted and weighted, and number of missing values for each survey and variable .....                                                                                                        | 11 |
| Table S7. Prevalence of condom use, men reporting any same-sex partner 2007, 2012, 2017 and associations with sociodemographic factors, sexual behaviours and substance use from univariable logistic regression, and multivariable logistic regression, 2007 and, 2012, 2017 .....                      | 13 |
| Table S8. Condom use in men reporting any same-sex partner 2012, 2017. Multivariable logistic regression 2017 including marital status. ....                                                                                                                                                             | 15 |
| Table S9. Condom use, women reporting any same-sex partner. Associations with sociodemographic factors, sexual behaviours and substance use from univariable logistic regression, 2007, 2012, 2017 and from multivariable logistic regression 2007 and multivariable logistic regression 2012, 2017..... | 16 |
| Table S10. Lifetime HIV testing, men and women with only opposite-sex partners. Denominators, unweighted and weighted, for each survey and variable .....                                                                                                                                                | 18 |
| Table S11. Lifetime HIV testing and associations from univariable and multivariable logistic regression, by sociodemographic and behavioural characteristics, in men reporting only opposite-sex partners 2007, 2012 and 2017 .....                                                                      | 20 |
| Table S12. Prevalence of lifetime HIV testing and associations from univariable and multivariable logistic regression, by sociodemographic and behavioural characteristics, in women reporting only opposite-sex partners 2007, 2012 and 2017 .....                                                      | 22 |
| Table S13. HIV testing in the last 12 months, men and women reporting only opposite-sex partners and men reporting any same-sex partner 2012, 2017. ....                                                                                                                                                 | 23 |
| Table S14. Lifetime HIV testing, men and women with any same-sex partners. Denominators, unweighted and weighted, and number of missing values for each survey and variable .....                                                                                                                        | 24 |
| Table S15. Lifetime HIV testing and associations from univariable and multivariable logistic regression, testing, by sociodemographic and behavioural characteristics in men reporting any male sex partner, 2007, 2012, 2017.....                                                                       | 26 |
| Table S16. Lifetime HIV testing, women reporting any same-sex partner, 2007, 2012, 2017. Associations with sociodemographic factors, sexual behaviours and substance use from univariable logistic regression .....                                                                                      | 27 |

Table S1. Filtering questions to determine eligible respondents to questions about condom use at last intercourse and HIV testing, according to survey year.

| Year | Criteria to determine respondents to question “Did you use a male condom the last time you had sex?” <sup>a</sup>                                                                                                |
|------|------------------------------------------------------------------------------------------------------------------------------------------------------------------------------------------------------------------|
| 2007 | a. Age between 16 and 74 years<br>b. Reported ever having had sexual intercourse<br>c. Reported ever having used a male condom                                                                                   |
| 2012 | a. Age between 16 and 74 years.<br>b. Reported ever having had sexual intercourse<br>c. Reported ever having had sex during the last 12 months                                                                   |
| 2017 | a. Age between 16 and 74 years<br>b. Reported ever having had sexual intercourse                                                                                                                                 |
|      | <b>Criteria to determine proportion of people who have had been tested for HIV in their lifetime, question “How many times have you been tested for AIDS?” “When was the last time?”</b>                         |
| 2007 | a. Age between 16 and 74 years.<br>b. Blood donors: apart from donating blood the number of HIV tests done or<br>c. Non-blood donors: the number of HIV tests done.<br>d. Year and month of first and last test. |
| 2012 | a. Participants older than 16 years<br>b. Blood donors: apart from donating blood the number of HIV tests done or<br>c. Non-blood donors: the number of HIV tests done.<br>d. Year and month the last test.      |
| 2017 | a. Participants between 16 and 74 years.<br>b. Number of HIV tests done in life<br>c. Tests done within 12 months or more than 12 months ago.                                                                    |

Questions about sexual partners referred to the sexual lifetime for the surveys in 2007 and 2012 and the last five years for the 2017 survey.

Table S2. Type of partner in men and women reporting any same-sex partner 2007,2012,2017

| Sexual partners                         | 2007<br>n (%) | 2012<br>n (%) | 2017<br>n (%) |
|-----------------------------------------|---------------|---------------|---------------|
| <b>Men</b>                              |               |               |               |
| <b>Total</b>                            | 204 (32)      | 246(39)       | 183 (29)      |
| Mainly with women, but at least one man | 94 (36)       | 117 (46)      | 47 (18)       |
| As many women as men                    | 20 (37)       | 23 (43)       | 11 (20)       |
| Mainly men but, at least one woman      | 43 (44)       | 43 (44)       | 12 (12)       |
| Only with men                           | 47 (21)       | 63 (28)       | 113 (51)      |
| <b>Women</b>                            |               |               |               |
| <b>Total</b>                            | 227 (32)      | 300 (43)      | 172 (25)      |
| Mainly with men, but at least one woman | 173 (34)      | 250(48)       | 92 (18)       |
| As many men as woman                    | 22 (51)       | 17 (40)       | 4 (9)         |
| Mainly women but, at least one man      | 25 (45)       | 23 (41)       | 8 (14)        |
| Only with women                         | 7 (8)         | 10 (12)       | 68 (80)       |

Table S3. Condom use at last sexual intercourse, men and women with only opposite-sex partners. Denominators, unweighted and weighted, for each survey and variable

|                                                   | Men           | Men           | Men           | Women         | Women         | Women         |
|---------------------------------------------------|---------------|---------------|---------------|---------------|---------------|---------------|
|                                                   | 2007          | 2012          | 2017          | 2007          | 2012          | 2017          |
| <b>Totals, N unweighted, weighted<sup>a</sup></b> | 6416,229110   | 7382, 2427588 | 8049, 2724669 | 7688,2311227  | 7025, 2132003 | 8428, 2557958 |
| <b>Age, years</b>                                 |               |               |               |               |               |               |
| 16-24                                             | 554, 296442   | 966, 295120   | 903, 301043   | 528, 250661   | 851, 255515   | 876, 258899   |
| 25-34                                             | 984, 395552   | 1,064, 454261 | 1111, 528079  | 1210, 409123  | 1130, 419164  | 1291, 505920  |
| 35-44                                             | 1574, 527561  | 1,470, 488511 | 1448, 530176  | 1817, 535968  | 1571, 471335  | 1625, 509388  |
| 45-54                                             | 1232, 460546  | 1,705, 550479 | 1864, 573081  | 1381, 454705  | 1784, 504578  | 1960, 558324  |
| 55-64                                             | 1206, 373066  | 1,267, 390680 | 1520, 465839  | 1527, 397531  | 1086, 307860  | 1604, 434936  |
| 65-74                                             | 866, 245944   | 910, 248536   | 1203, 326452  | 1225, 263240  | 603, 173550   | 1072, 290492  |
| <b>Region</b>                                     |               |               |               |               |               |               |
| Lake Geneva                                       | 61, 427987    | 1317, 440506  | 1424, 508007  | 43, 436777    | 1290, 407290  | 1550, 479185  |
| Midland                                           | 52, 518003    | 1435, 542392  | 1579, 587768  | 38, 522838    | 1389, 472081  | 1739, 593088  |
| Northwest                                         | 56, 307767    | 1026, 325278  | 849, 352834   | 16, 320667    | 979, 291493   | 904, 351691   |
| Zurich                                            | 40, 413510    | 740, 415267   | 880, 488010   | 26, 391749    | 663, 344353   | 921, 443955   |
| East                                              | 29, 338110    | 1117, 369950  | 1528, 390425  | 20, 303656    | 994, 300103   | 1487, 341979  |
| Central                                           | 36, 207440    | 1218, 229857  | 1227, 275223  | 20, 235853    | 1187, 217857  | 1252, 241036  |
| Ticino                                            | 15, 86293     | 529, 104338   | 562, 122401   | 9, 99688      | 523, 98827    | 575, 107024   |
| <b>Highest educational level</b>                  |               |               |               |               |               |               |
| No school/primary                                 | 627, 260072   | 842, 274694   | 951, 292971   | 1188, 348046  | 894, 275746   | 1035, 288781  |
| Secondary                                         | 3531, 1251313 | 3599, 1181527 | 3783, 1264045 | 5096, 1535478 | 4315, 1283197 | 4772, 1400556 |
| Tertiary                                          | 2257, 787519  | 2924, 966760  | 3301, 1163362 | 1401, 426510  | 1797, 567319  | 2600, 860448  |
| Missing                                           | 1, 206        | 17, 4608      | 14, 4291      | 3, 1193       | 19, 5740      | 21, 8173      |
| <b>Income, SFr</b>                                |               |               |               |               |               |               |
| No income                                         | 150, 64499    | 25, 177565    | 346, 112507   | 889, 293752   | 918, 279067   | 978, 271987   |
| <4500                                             | 2183, 806982  | 2344, 790486  | 2689, 918762  | 4434, 1363467 | 4031, 1221547 | 4953, 1466363 |
| 4500-6000                                         | 1569, 539763  | 1718, 570588  | 1897, 654101  | 895, 249927   | 730, 222686   | 1049, 356014  |
| >6000                                             | 1832, 652958  | 2242, 725455  | 2524, 850147  | 418, 112380   | 461, 132703   | 735, 251417   |
| Missing                                           | 682, 234908   | 827, 263494   | 593, 189153   | 1052, 291702  | 885, 276000   | 713, 212177   |
| <b>Marital status</b>                             |               |               |               |               |               |               |
| Single                                            | 1843, 722189  | 2281, 849328  | 2407, 995481  | 1840, 587443  | 1798, 585228  | 2255, 795789  |
| Married                                           | 3684, 1354831 | 4391, 328466  | 4916, 1447463 | 4091, 1357416 | 4400, 1262541 | 5105, 1414870 |
| Widowed                                           | 153, 32443    | 84,28715      | 71, 24841     | 671, 120218   | 132, 40937    | 206, 59874    |
| Divorced                                          | 734, 188300   | 575, 219908   | 655, 256884   | 1083, 245648  | 693, 241865   | 862, 287426   |
| Missing                                           | 2, 1347       | 3, 1171       | 0,0           | 3, 502        | 2, 1431       | 0,0           |

|                                      |               |               |                 |               |               |               |
|--------------------------------------|---------------|---------------|-----------------|---------------|---------------|---------------|
| <b>Sex partners last 12m</b>         |               |               |                 |               |               |               |
| 1                                    | 5035, 1848213 | 6382, 2095192 | 6498, 2158653   | 5916, 1933962 | 6583, 1995736 | 6960, 2094370 |
| 2-4                                  | 686, 247747   | 731, 243845   | 666, 255717     | 421, 126990   | 397, 121682   | 374, 127432   |
| 5+                                   | 205, 77071    | 228, 77697    | 199, 79313      | 35, 10850     | 29, 8387      | 30, 11663     |
| Missing                              | 490, 126080   | 41, 10854     | 686, 230987     | 1316, 239425  | 16, 6198      | 1064, 324494  |
| <b>Sex frequency last 12m</b>        | Not asked     |               |                 | Not asked     |               |               |
| 1-2 per year                         | ..            | 271, 80731    | 351, 118565     | ..            | 325, 93051    | 376, 111423   |
| 1 per month                          | ..            | 828, 261277   | 1028, 329464    | ..            | 864, 249163   | 1124, 338486  |
| 2-3 per month                        | ..            | 1472, 473009  | 1701, 546318    | ..            | 1283, 375995  | 1718, 511495  |
| 1 per week                           | ..            | 1991, 650719  | 1944, 665376    | ..            | 1975, 607513  | 2090, 629519  |
| 2-3 per week                         | ..            | 2267, 765183  | 1962, 693239    | ..            | 2071, 652754  | 1680, 531014  |
| 4+ per week                          | ..            | 398, 149006   | 320, 118262     | ..            | 257, 79908    | 210, 70530    |
| Missing                              | ..            | 155, 47662    | 743, 253443     | ..            | 250, 73619    | 1219, 365490  |
| <b>Partner type last intercourse</b> | Not asked     |               |                 | Not asked     |               |               |
| Stable                               | ..            | 6665, 2190882 | 7173, 2393191   | ..            | 6714, 2040553 | 7982, 2409173 |
| Occasional                           | ..            | 677, 226436   | 803, 302565     | ..            | 306, 90071    | 433, 145050   |
| Sex worker                           | ..            | 31, 7646      | 67, 26208       | ..            | 0, 0          | 1, 200        |
| Missing                              | ..            | 9, 2585       | 6, 2705         | ..            | 5, 1380       | 12, 3535      |
| <b>HIV testing</b>                   |               |               |                 |               |               |               |
| Never tested                         | 5452, 1971699 | 4345, 1383746 | 4580, 1482996   | 6431, 1956232 | 3831, 1128432 | 4344, 1228391 |
| >12m ago                             | 624, 210219   | 2337, 801418  | 2857, 1017787   | 840, 239967   | 2443, 767295  | 3432, 1096425 |
| Within last 12m                      | 293, 98775    | 487, 171075   | 524, 197190     | 371, 102371   | 568, 182702   | 537, 199462   |
| Missing                              | 47, 18417     | 213, 71350    | 88, 26695       | 46, 12657     | 183, 53574    | 115, 33680    |
| <b>Alcohol</b>                       |               |               |                 |               |               |               |
| No use                               | 527, 188977   | 582, 218019   | 818, 285192     | 1384, 405764  | 1132, 342310  | 1533, 470954  |
| Daily                                | 1365, 425641  | 1261, 375407  | 1175, 352970    | 753, 197280   | 549, 152674   | 521, 143233   |
| Weekly                               | 3397, 1270669 | 4171, 1362093 | 4626, 1583047   | 2954, 932680  | 3137, 958014  | 3963, 1228355 |
| Monthly                              | 1122, 411170  | 1367, 471796  | 1428, 502750    | 2595, 774999  | 2206, 678812  | 2410, 715234  |
| Missing                              | 5, 2653       | 1, 273        | 2,711           | 2, 504        | 1, 193        | 1, 182        |
| <b>Tobacco</b>                       |               |               |                 |               |               |               |
| Non-smoker                           | 4236, 1503618 | 4891, 1575101 | 5488, 1807651   | 5670, 1712757 | 5175, 1557199 | 6315, 1889971 |
| Casual smoker                        | 619, 224346   | 726, 244321   | 776, 287648     | 463, 147473   | 486, 147355   | 605, 196721   |
| Daily smoker                         | 1561, 571147  | 1764, 606873  | 1785, 629371    | 1553, 450552  | 1364, 427449  | 1507, 471044  |
| Missing                              |               | 7, 1293       | 0, 0            | 2, 444        | 0, 0          | 1, 222        |
| <b>Cannabis<sup>b</sup></b>          |               |               |                 |               |               |               |
| No use                               | 4313, 1548932 | 5302, 1693509 | 5549, 1, 770092 | 5876, 1795362 | 5828, 1740879 | 6547, 1912407 |
| >12m ago                             | 1361, 509256  | 1525, 548295  | 1836, 683783    | 1105, 356307  | 959, 314830   | 1532, 523148  |

|                                           |               |               |               |               |               |               |
|-------------------------------------------|---------------|---------------|---------------|---------------|---------------|---------------|
| Within last 12m                           | 319, 126221   | 534, 178092   | 633, 258879   | 121, 38680    | 221, 71061    | 333, 118541   |
| Missing                                   | 423, 114702   | 21, 7693      | 31,11915      | 586, 120879   | 17, 5233      | 13, 3863      |
| <b>Other illicit drugs<sup>b, c</sup></b> |               |               |               |               |               |               |
| No use                                    | 5683, 2076343 | 6958, 2275033 | 7469, 2479592 | 1182, 2137731 | 6798, 2058121 | 8123, 2444996 |
| >12m ago                                  | 317, 108801   | 392, 140247   | 522, 217782   | 100, 56689    | 217, 70348    | 289, 106705   |
| Within last 12m                           | 13, 4404      | 22, 8031      | 45, 21281     | 5, 754        | 7, 2877       | 12, 5399      |
| Missing                                   | 403, 109563   | 10, 4277      | 13, 6013      | 571, 116053   | 3, 656        | 4, 858        |

a. Overall denominators for condom use and HIV testing differ because eligibility criteria for answering each question differed;

b. In 2007 questions about drugs were only asked to people between 15 to 69 years;

c. Combines use of ecstasy, cocaine, or heroin

Abbreviations: m, months; SFr, Swiss Francs; yrs, years; ..., question not asked.

Table S4. Condom use, men and women reporting only opposite-sex partners, 2007. Prevalence and associations with sociodemographic factors, sexual behaviours and substance use

| Condom Use                        | Men 2007            |                        |                                   | Women 2007          |                        |                                   |
|-----------------------------------|---------------------|------------------------|-----------------------------------|---------------------|------------------------|-----------------------------------|
|                                   | Prevalence (95% CI) | Unadjusted OR (95% CI) | Adjusted OR (95% CI) <sup>a</sup> | Prevalence (95% CI) | Unadjusted OR (95% CI) | Adjusted OR (95% CI) <sup>a</sup> |
| <b>Total</b>                      | 26 (24-27)          |                        |                                   | 20 (18-21)          |                        |                                   |
| <b>Age, years</b>                 |                     | p<0.001                | p<0.001                           |                     | p<0.001                | p<0.001                           |
| Median (IQR) <sup>b</sup>         | 29 (21-41)          | 0.93 (0.92, 0.93)      | 0.95 (0.94, 0.96)                 | 32 (22-42)          | 0.94 (0.93, 0.94)      | 0.95 (0.94, 0.96)                 |
| 16-24                             | 64 (59-69)          | -                      | -                                 | 43 (38-48)          | -                      | -                                 |
| 25-34                             | 30 (26-33)          | -                      | -                                 | 24 (21-26)          | -                      | -                                 |
| 35-44                             | 19 (17-22)          | -                      | -                                 | 16 (14-18)          | -                      | -                                 |
| 45-54                             | 12 (10-14)          | -                      | -                                 | 10 (8-12)           | -                      | -                                 |
| 55-64                             | 7 (5-9)             | -                      | -                                 | 5 (3-6)             | -                      | -                                 |
| 65-74                             | 6 (4-8)             | -                      | -                                 | 3 (2-5)             | -                      | -                                 |
| <b>Region</b>                     |                     | p=0.9                  | p=0.9                             |                     | p=0.004                | p=0.15                            |
| Lake Geneva                       | 23 (20-26)          | reference              | reference                         | 15 (13-17)          | reference              | reference                         |
| Midland                           | 22 (19-25)          | 0.94 (0.74, 1.19)      | 0.99 (0.74, 1.34)                 | 15 (13-17)          | 1.04 (0.82, 1.32)      | 1.32 (0.97, 1.80)                 |
| Northwest                         | 21 (18-25)          | 0.93 (0.70, 1.23)      | 1 (0.71, 1.41)                    | 13 (10-15)          | 0.84 (0.62, 1.12)      | 1 (0.68, 1.47)                    |
| Zurich                            | 22 (19-26)          | 0.97 (0.76, 1.25)      | 1.14 (0.82, 1.58)                 | 19 (16-22)          | 1.34 (1.03, 1.73)      | 1.51 (1.07, 2.13)                 |
| East                              | 23 (19-27)          | 1 (0.75, 1.34)         | 0.91 (0.63, 1.31)                 | 16 (13-20)          | 1.13 (0.84, 1.54)      | 1.44 (0.98, 2.12)                 |
| Central                           | 21 (17-25)          | 0.92 (0.69, 1.23)      | 0.94 (0.65, 1.35)                 | 18 (15-21)          | 1.27 (0.97, 1.67)      | 1.31 (0.92, 1.88)                 |
| Ticino                            | 4 (4-5)             | 1 (0.73, 1.36)         | 1.08 (0.71, 1.66)                 | 4 (4-5)             | 0.74 (0.53, 1.03)      | 1.04 (0.66, 1.64)                 |
| <b>Highest education level</b>    |                     | p<0.001                | p=0.3                             |                     | p=0.001                | p=0.086                           |
| No school/primary                 | 39 (34-44)          | reference              | reference                         |                     | reference              | reference                         |
| Secondary                         | 22 (20-24)          | 0.43 (0.34, 0.55)      | 0.76 (0.53, 1.07)                 |                     | 0.78 (0.61, 1.00)      | 0.78 (0.61, 1.00)                 |
| Tertiary                          | 17 (15-19)          | 0.32 (0.25, 0.41)      | 0.8 (0.54, 1.18)                  |                     | 1.08 (0.83, 1.43)      | 1.08 (0.83, 1.43)                 |
| <b>Income, SFr</b>                |                     | p<0.001                | p=0.3                             |                     | p=0.3                  | p=0.9                             |
| No Income                         | 52 (42-62)          | 2.46 (1.62, 3.73)      | 1.1 (0.67, 1.81)                  | 14 (11-17)          | 0.82 (0.63, 1.08)      | 1 (0.73, 1.37)                    |
| <4500                             | 30 (28-33)          | reference              | reference                         | 16 (15-18)          | reference              | reference                         |
| 4500-6000                         | 18 (16-20)          | 0.49 (0.40, 0.60)      | 0.8 (0.62, 1.03)                  | 18 (15-21)          | 1.12 (0.90, 1.41)      | 0.96 (0.71, 1.29)                 |
| >6000                             | 13 (12-15)          | 0.35 (0.28, 0.43)      | 0.81 (0.60, 1.09)                 | 16 (12-20)          | 0.97 (0.70, 1.36)      | 1.12 (0.73, 1.71)                 |
| <b>Marital status</b>             |                     | p<0.001                | p<0.001                           |                     | p<0.001                | p<0.001                           |
| Single                            | 46 (43-49)          | 7.74 (6.44, 9.31)      | 2.14 (1.62, 2.82)                 | 36 (33-39)          | 6.77 (5.61, 8.17)      | 6.77 (5.61, 8.17)                 |
| Married                           | 10 (9-11)           | reference              | reference                         | 8 (7-09)            | reference              | reference                         |
| Widowed                           | 4 (2-7)             | 0.37 (0.18, 0.76)      | 0.18 (0.05, 0.68)                 | 8 (5-12)            | 1.07 (0.68, 1.67)      | 1.07 (0.68, 1.67)                 |
| Divorced                          | 18 (14-22)          | 1.93 (1.44, 2.58)      | 1.41 (0.97, 2.06)                 | 15 (13-18)          | 2.21 (1.70, 2.88)      | 2.21 (1.70, 2.88)                 |
| <b>Age first intercourse, yrs</b> |                     | p<0.001                | p<0.001                           |                     | p<0.001                | p<0.001                           |
| Median (IQR) <sup>b</sup>         | 18 (16-19)          | 0.94 (0.91, 0.96)      | 1.08 (1.04, 1.11)                 | 18 (16.0, 20.0)     | 0.94 (0.91, 0.97)      | 1.09 (1.05, 1.13)                 |
| <16                               | 28 (25-32)          | -                      | -                                 | 22 (19-25)          | -                      | -                                 |
| 16-18                             | 22 (20-25)          | -                      | -                                 | 17 (15-19)          | -                      | -                                 |
| 19-25                             | 19 (17-21)          | -                      | -                                 | 12 (11-14)          | -                      | -                                 |
| 26-30                             | 13 (08-19)          | -                      | -                                 | 13 (08-20)          | -                      | -                                 |
| >30                               | 16 (05-34)          | -                      | -                                 | 15 (06-30)          | -                      | -                                 |
| <b>Sex partners last 12m</b>      |                     | p<0.001                | p<0.001                           |                     | p<0.001                | p<0.001                           |
| 1                                 | 15 (14-17)          | reference              | reference                         | 12 (11-13)          | reference              | reference                         |
| 2-4                               | 53 (48-58)          | 6.41 (5.10, 8.04)      | 2.97 (2.22, 3.96)                 | 49 (43-55)          | 6.77 (5.20, 8.81)      | 2.81 (2.06, 3.82)                 |
| 5+                                | 63 (54-71)          | 9.58 (6.55, 14.0)      | 3.43 (2.16, 5.44)                 | 40 (20-63)          | 4.73 (1.97, 11.4)      | 3.04 (1.20, 7.67)                 |
| <b>HIV testing</b>                |                     | p=0.2                  | p=0.05                            |                     | p<0.001                | p=0.4                             |
| Never                             | 22 (20-23)          | reference              | reference                         | 15 (14-16)          | reference              | reference                         |
| >12m ago                          | 24 (20-29)          | 1.18 (0.92, 1.50)      | 1.16 (0.85, 1.58)                 | 19 (16-22)          | 1.32 (1.05, 1.66)      | 1.18 (0.89, 1.58)                 |
| Within last 12m                   | 26 (20-33)          | 1.29 (0.91, 1.81)      | 0.86 (0.55, 1.32)                 | 26 (21-32)          | 2.03 (1.51, 2.75)      | 1.15 (0.78, 1.68)                 |
| <b>Alcohol</b>                    |                     | p<0.001                | p=0.3                             |                     | p<0.001                | p=0.5                             |
| No use                            | 25 (20-31)          | reference              | reference                         | 13 (11-15)          | reference              | reference                         |
| Daily                             | 10 (9-13)           | 0.34 (0.24, 0.50)      | 0.66 (0.43, 1.02)                 | 7 (05-09)           | 0.48 (0.31, 0.74)      | 1.03 (0.58, 1.81)                 |
| Weekly                            | 25 (23-27)          | 0.96 (0.70, 1.33)      | 0.82 (0.56, 1.20)                 | 17 (15-19)          | 1.41 (1.10, 1.80)      | 1.12 (0.81, 1.57)                 |

|                                          |            |                   |                   |             |                   |                   |
|------------------------------------------|------------|-------------------|-------------------|-------------|-------------------|-------------------|
| Monthly                                  | 24 (21-28) | 0.94 (0.66, 1.34) | 0.85 (0.56, 1.28) | 18 (16-20)  | 1.46 (1.13, 1.87) | 1.27 (0.91, 1.77) |
| <b>Tobacco</b>                           |            | p=0.023           | p=0.2             |             | p<0.001           | p=0.02            |
| Non-smoker                               | 21 (19-22) | reference         | reference         | 15 (14-16)  | reference         | reference         |
| Casual smoker                            | 25 (20-29) | 1.26 (0.96, 1.64) | 0.91 (0.66, 1.27) | 24 (20-29)  | 1.86 (1.41, 2.45) | 0.95 (0.65, 1.40) |
| Daily smoker                             | 25 (22-27) | 1.26 (1.05, 1.50) | 0.78 (0.61, 1.00) | 16 (14-18)  | 1.10(0.91, 1.34)  | 0.68 (0.51, 0.90) |
| <b>Cannabis<sup>c</sup></b>              |            | p<0.001           | p=0.9             |             | p<0.001           | p=0.6             |
| No use                                   | 19 (17-21) | reference         | reference         | 15 (13-16)  | reference         | reference         |
| >12m ago                                 | 29 (26-32) | 1.51 (1.25, 1.81) | 1.01 (0.79, 1.29) | 23 (20-26)  | 1.01 (0.76, 1.34) |                   |
| Within last 12m                          | 44 (38-51) | 2.83 (2.09, 3.82) | 1.12 (0.74, 1.71) | 38 (28-48)  | 1.34 (0.78, 2.31) |                   |
| <b>Other illicit drugs<sup>c,d</sup></b> |            | p=0.059           | p=0.8             |             | p<0.001           | p=0.009           |
| No use                                   | 22 (21-24) | reference         | reference         | 16 (15-17)  | reference         | reference         |
| >12m ago                                 | 32 (26-39) | 1.78 (1.49, 2.14) | 0.87 (0.57, 1.32) | 33 (25-42)  | 1.76 (1.44, 2.15) | 1.01 (0.76, 1.34) |
| Within last 12m                          | 38 (8-77)  | 3.45 (2.56, 4.65) | 1.12 (0.15, 8.12) | 49 (00-100) | 3.54 (2.27, 5.51) | 1.34 (0.78, 2.31) |

- Multivariable model includes all variables in the table, p value from Wald test;
- Median age of the proportion who used a condom;
- In 2007 questions about drugs were only asked to people between 15 to 69 years;
- Combines use of ecstasy, cocaine, or heroin.

Abbreviations: CI, confidence interval; m, months; OR, odds ratio; SFr, Swiss Francs; yrs, years.



Table S5. Condom use, men and women reporting only opposite-sex partners, 2012,2017. Prevalence and associations with sociodemographic factors, sexual behaviours, and substance use

|                                      | Men 2012            |                        | Men 2017            |                        | Women 2012          | Women 2012             |                     | Women 2017          | Unadjusted OR (95% CI) |
|--------------------------------------|---------------------|------------------------|---------------------|------------------------|---------------------|------------------------|---------------------|---------------------|------------------------|
| Condom use                           | Prevalence (95% CI) | Unadjusted OR (95% CI) | Prevalence (95% CI) | Unadjusted OR (95% CI) | Prevalence (95% CI) | Unadjusted OR (95% CI) | Prevalence (95% CI) | Prevalence (95% CI) | Unadjusted OR (95% CI) |
| <b>Age, yrs</b>                      |                     | p<0.001                |                     | p<0.001                |                     | p<0.001                |                     |                     | p<0.001                |
| Median (IQR) <sup>a</sup>            | 24 (22, 25)         | 0.92 (0.92, 0.93)      | 32 (24, 44)         | 0.94 (0.93, 0.94)      | 31 (22, 41)         | 0.93 (0.92, 0.93)      | 34 (25, 45)         | 0.94 (0.94, 0.95)   |                        |
| 16-24                                | 67 (63 -70)         |                        | 64 (60 - 68)        |                        | 47 (43-51)          |                        | 48 (44-52)          |                     |                        |
| 25-34                                | 35 (31-39)          |                        | 36 (36 - 43)        |                        | 26 (22-9)           |                        | 31 (28-34)          |                     |                        |
| 35-44                                | 20 (18-23)          |                        | 27 (24 - 29)        |                        | 18 (16 -20)         |                        | 23 (21-25)          |                     |                        |
| 45-54                                | 13 (11- 15)         |                        | 19 (17 - 21)        |                        | 10 (9 -12)          |                        | 15 (14-17)          |                     |                        |
| 55-64                                | 8 (6- 10)           |                        | 11 (9 - 13)         |                        | 3 (2 -5)            |                        | 9 (7-11)            |                     |                        |
| 65-74                                | 5 (4- 8)            |                        | 6 (4 - 7)           |                        | 2 (1- 3)            |                        | 4 (3-6)             |                     |                        |
| <b>Region</b>                        |                     | p=0.4                  |                     | p=0.8                  |                     | p=0.13                 |                     |                     | p=0.009                |
| Lake Geneva                          | 25 (22-27)          | reference              | 27 (25-30)          | reference              | 15 (12-17)          | reference              | 22 (20-25)          | reference           |                        |
| Midland                              | 22 (20-25)          | 0.88 (0.71, 1.10)      | 25 (23-28)          | 0.89 (0.74, 1.08)      | 18 (16-21)          | 1.33 (1.04, 1.71)      | 18 (16-20)          | 0.75 (0.62, 0.91)   |                        |
| Northwest                            | 23 (20-27)          | 0.94 (0.74, 1.18)      | 26 (23-30)          | 0.94 (0.75, 1.17)      | 17 (15-21)          | 1.25 (0.95, 1.64)      | 22 (19-25)          | 0.97 (0.78, 1.21)   |                        |
| Zurich                               | 24 (20-27)          | 0.96 (0.75, 1.23)      | 27 (24-30)          | 0.98 (0.79, 1.21)      | 19 (16-22)          | 1.36 (1.03, 1.79)      | 22 (19-25)          | 0.97 (0.78, 1.20)   |                        |
| East                                 | 23 (19-27)          | 0.93 (0.71, 1.21)      | 25 (23-28)          | 0.9 (0.74, 1.10)       | 18 (15-22)          | 1.29 (0.97, 1.72)      | 23 (20-25)          | 1 (0.82, 1.23)      |                        |
| Central                              | 26 (23-30)          | 1.11 (0.88, 1.39)      | 28 (25-32)          | 1.03 (0.83, 1.28)      | 20 (17-23)          | 1.44 (1.12, 1.84)      | 22 (19-25)          | 0.96 (0.76, 1.21)   |                        |
| Ticino                               | 20 (17-25)          | 0.79 (0.60, 1.05)      | 27 (23-31)          | 0.96 (0.75, 1.23)      | 18 (15-23)          | 1.33 (0.97, 1.82)      | 16 (13-20)          | 0.68 (0.52, 0.89)   |                        |
| <b>Highest education level</b>       |                     | p<0.001                |                     | p<0.001                |                     | p=0.025                |                     |                     | p<0.001                |
| No school/primary                    | 36 (32-40)          | reference              | 37 (34-41)          | reference              | 20 (17-24)          | reference              | 23 (21-27)          | reference           |                        |
| Secondary                            | 25 (23 - 27)        | 0.59 (0.48, 0.72)      | 28 (26-29)          | 0.64 (0.54, 0.77)      | 16 (15-18)          | 0.79 (0.62, 1.01)      | 19(18-20)           | 0.76 (0.63, 0.92)   |                        |
| Tertiary                             | 18 (17- 20)         | 0.4 (0.33, 0.50)       | 23 (21-25)          | 0.64 (0.54, 0.77)      | 20 (17-22)          | 0.98 (0.74, 1.28)      | 23 (21-25)          | 0.99 (0.81, 1.21)   |                        |
| <b>Income, SFr</b>                   |                     | p<0.001                |                     | p<0.001                |                     | p<0.001                |                     |                     | p=0.3                  |
| No income                            | 58 (49-65)          | 2.62 (1.85, 3.69)      | 58 (49- 65)         | 1.91 (1.46, 2.49)      | 21 (18- 24)         | 1.19 (0.95, 1.47)      | 24 (21- 28)         | 1.23 (1.02, 1.49)   |                        |
| <4500                                | 34 (31-37)          | reference              | 34 (31- 37)         | reference              | 18 (17- 20)         | reference              | 21 (19- 22)         | reference           |                        |
| 4500-6000                            | 19 (16-21)          | 0.44 (0.36, 0.54)      | 19 (16- 21)         | 0.56 (0.47, 0.66)      | 17 (14- 21)         | 0.91 (0.69, 1.20)      | 22 (19- 25)         | 1.1 (0.91, 1.34)    |                        |
| >6000                                | 15 (13 -17)         | 0.33 (0.28, 0.40)      | 15 (13- 17)         | 0.45 (0.38, 0.52)      | 18 (13- 23)         | 0.96 (0.69, 1.34)      | 20 (17- 25)         | 1.01 (0.80, 1.28)   |                        |
| <b>Marital status</b>                |                     | p<0.001                |                     | p<0.001                |                     | p<0.001                |                     |                     | p<0.001                |
| Single                               | 46 (43- 48)         | 6.73 (5.72, 7.91)      | 48 (46- 51)         | 6.37 (5.54, 7.32)      | 36 (33-39)          | 4.92 (4.15, 5.84)      | 38 (35-40)          | 4.25 (3.69, 4.90)   |                        |
| Married                              | 11 (10- 12)         | reference              | 13 (12- 14)         | reference              | 10 (9-11)           | reference              | 12 (11-14)          | reference           |                        |
| Widowed                              | 11 (5-19)           | 0.97 (0.47, 2.03)      | 13 (6-26)           | 0.98 (0.38, 2.50)      | 10 (5-17)           | 0.96 (0.48, 1.95)      | 10 (6-16)           | 0.81 (0.47, 1.39)   |                        |
| Divorced                             | 15 (11- 18)         | 1.5 (1.10, 2.05)       | 19 (16- 23)         | 1.6 (1.23, 2.07)       | 14 (11-17)          | 1.22 (0.87, 1.70)      | 19 (16-22)          | 1.68 (1.35, 2.10)   |                        |
| <b>Age first intercourse, yrs</b>    |                     | p<0.001                |                     | p=0.3                  |                     | p<0.001                |                     |                     | p=0.9                  |
| Per year increase                    |                     | 0.90 (0.88, 0.93)      |                     | 0.99 (0.98, 1.01)      |                     | 0.93 (0.90, 0.96)      |                     | 1 (0.98, 1.02)      |                        |
| <b>Sex partners last 12m</b>         |                     | p<0.001                |                     | p<0.001                |                     | p<0.001                |                     |                     | p<0.001                |
| 1                                    | 17 (16-18)          | reference              | 19 (18-20)          | reference              | 15 (14-16)          | reference              | 18 (17-19)          | reference           |                        |
| 2-4                                  | 64 (59-69)          | 8.78 (7.03, 11.0)      | 61 (56-65)          | 6.55 (5.33, 8.05)      | 55 (49-61)          | 6.92 (5.32, 9.00)      | 55 (49-61)          | 5.71 (4.46, 7.33)   |                        |
| 5+                                   | 71 (62-80)          | 12.3 (7.97, 19.1)      | 73 (65-80)          | 11.6 (7.84, 17.2)      | 61 (35-83)          | 8.71 (3.38, 22.4)      | 56 (33-77)          | 5.81 (2.45, 13.8)   |                        |
| <b>Sex frequency last 12 m</b>       |                     | p<0.001                |                     | p<0.001                |                     | p<0.001                |                     |                     | p<0.001                |
| 1-2 per year                         | 54 (47-61)          | 2.53 (1.76, 3.63)      | 46 (40-53)          | 1.78 (1.32, 2.39)      | 38 (31-46)          | 2.24 (1.53, 3.28)      | 37 (32-43)          | 1.96 (1.45, 2.66)   |                        |
| 1 per month                          | 32 (27-36)          | reference              | 33 (29-36)          | reference              | 22 (18-25)          | reference              | 23 (20-26)          | reference           |                        |
| 2-3 per month                        | 27 (24-30)          | 0.81 (0.62, 1.04)      | 29 (27-32)          | 0.85 (0.69, 1.04)      | 21 (18-23)          | 0.94 (0.72, 1.23)      | 20 (18-23)          | 0.83 (0.67, 1.04)   |                        |
| 1 per week                           | 18 (16-20)          | 0.47 (0.36, 0.61)      | 23 (21-26)          | 0.62 (0.51, 0.77)      | 16 (14-18)          | 0.66 (0.51, 0.86)      | 18 (16-20)          | 0.74 (0.59, 0.91)   |                        |
| 2-3 per week                         | 20 (18-22)          | 0.54 (0.42, 0.70)      | 18 (16-20)          | 0.45 (0.36, 0.55)      | 15 (13-17)          | 0.62 (0.48, 0.80)      | 17 (15-20)          | 0.7 (0.55, 0.87)    |                        |
| 4+ per week                          | 24 (18-29)          | 0.66 (0.45, 0.96)      | 21 (16-27)          | 0.56 (0.39, 0.81)      | 12 (7-20)           | 0.51 (0.27, 0.98)      | 17 (12-23)          | 0.68 (0.44, 1.04)   |                        |
| <b>Partner type last intercourse</b> |                     | p<0.001                |                     | p<0.001                |                     | p<0.001                |                     |                     | p<0.001                |
| Stable                               | 17 (16-19)          | reference              | 20 (19- 21)         | reference              | 15 (14-16)          | reference              | 18 (17-19)          | reference           |                        |
| Occasional                           | 81 (77-85)          | 20.8 (15.8, 27.5)      | 75 (71-78)          | 12.2 (9.98, 14.9)      | 72 (65-78)          | 14 (10.1, 19.4)        | 68 (62-73)          | 9.46 (7.37, 12.1)   |                        |
| Sex worker                           | 85 (66-95)          | 26.1 (9.52, 71.4)      | 87 (74-95)          | 26.3 (11.1, 62.8)      | Not asked           | -                      | Not asked           | -                   |                        |
| <b>HIV testing</b>                   |                     | p<0.001                |                     | p<0.001                |                     | p<0.001                |                     |                     | p<0.001                |
| Never tested                         | 24 (22-25)          | reference              | 26 (24-28)          | reference              | 18 (16-19)          | reference              | 20 (18- 21)         | reference           |                        |
| >12m ago                             | 21 (18-23)          | 0.84 (0.71, 0.99)      | 25 (23-27)          | 0.95 (0.84, 1.09)      | 16 (14-18)          | 0.91 (0.77, 1.08)      | 20 (19-22)          | 1.03 (0.90, 1.17)   |                        |
| Within last 12m                      | 37 (31-43)          | 1.9 (1.45, 2.50)       | 38 (33-43)          | 1.77 (1.41, 2.22)      | 25 (21-30)          | 1.58 (1.23, 2.04)      | 31 (27-36)          | 1.83 (1.45, 2.31)   |                        |
| <b>Alcohol</b>                       |                     | p<0.001                |                     | p=0.001                |                     | p<0.001                |                     |                     | p<0.001                |

|                                        |            |                   |            |                   |            |                   |             |                   |
|----------------------------------------|------------|-------------------|------------|-------------------|------------|-------------------|-------------|-------------------|
| No use                                 | 28 (23-34) | reference         | 31 (27-35) | reference         | 14 (12-17) | reference         | 23 (20-25)  | reference         |
| Daily                                  | 13 (10-15) | 0.37 (0.26, 0.52) | 11 (9-14)  | 0.28 (0.21,0.38)  | 6 (4-9)    | 0.42 (0.27, 0.65) | 9 (7-13)    | 0.35 (0.24,0.52)  |
| Weekly                                 | 25 (23-27) | 0.86 (0.65, 1.14) | 27 (26-29) | 0.83 (0.68,1.01)  | 18 (16-20) | 1.33 (1.04, 1.69) | 20 (19-22)  | 0.87 (0.74, 1.04) |
| Monthly                                | 26 (22-29) | 0.88 (0.64, 1.20) | 32 (29-35) | 1.06 (0.84, 1.32) | 22 (19-24) | 1.67 (1.30, 2.15) | 23 (21- 25) | 1.02 (0.84, 1.22) |
| <b>Tobacco</b>                         |            | p=0.11            |            | p=0.11            |            | p<0.001           |             | p<0.001           |
| Non-smoker                             | 22 (20-23) | reference         | 26 (24-27) | reference         | 17 (15-18) | reference         | 20 (19-21)  | reference         |
| Casual smoker                          | 29 (24-34) | 1.44 (1.12, 1.86) | 30 (26-34) | 1.24 (1.01, 1.51) | 25 (21-30) | 1.68 (1.29, 2.19) | 31 (26- 35) | 1.79 (1.45, 2.22) |
| Daily smoker                           | 26 (23-29) | 1.27 (1.07, 1.49) | 26 (24-29) | 1.02 (0.88, 1.19) | 19 (17-22) | 1.21 (0.99, 1.48) | 21 (19-24)  | 1.11 (0.94, 1.31) |
| <b>Cannabis</b>                        |            | p<0.001           |            | p<0.001           |            | p<0.001           |             | p<0.001           |
| No use                                 | 24 (23-26) | reference         | 24 (23-26) | reference         | 16 (15-17) | reference         | 19 (18-21)  | reference         |
| >12m ago                               | 27 (25-30) | 1.17 (0.97, 1.41) | 27 (25-30) | 1.15 (0.99, 1.34) | 21 (18-25) | 1.42 (1.15, 1.75) | 23 (21-26)  | 1.28 (1.09, 1.49) |
| Within last 12m                        | 39 (34-43) | 2.97 (2.35, 3.74) | 39 (35-44) | 1.99 (1.61, 2.44) | 38 (30-47) | 3.17 (2.17, 4.63) | 37 (31-43)  | 2.41 (1.83, 3.16) |
| <b>Other illicit drugs<sup>b</sup></b> |            | p<0.001           |            | p<0.001           |            | p=0.016           |             | p=0.075           |
| No use                                 | 23 (22-24) | reference         | 26 (25-27) | reference         | 18 (16-19) | reference         | 21 (20-22)  | reference         |
| >12m ago                               | 30 (24-37) | 1.48 (1.11, 1.97) | 30 (26-35) | 1.24 (0.98, 1.57) | 26 (19-33) | 1.62 (1.09, 2.41) | 23 (18-29)  | 1.15 (0.82, 1.60) |
| Within last 12m                        | 60 (29-87) | 5.12 (1.66, 15.7) | 36 (22-53) | 1.63 (0.84, 3.17) | 45 (0- 99) | 3.89 (0.75, 20.3) | 54 (9-94)   | 4.41 (1.17, 16.6) |

d. Median age of the proportion who used a condom;

e. Combines use of ecstasy, cocaine, or heroin.

Abbreviations: CI, confidence interval; IQR, interquartile range; m, months; OR, odds ratio, CHF, Swiss Francs; yrs, years.

Table S6. Condom use at last sexual intercourse, men and women with any same-sex partners. Denominators, unweighted and weighted, and number of missing values for each survey and variable

| Condom use                                        | Men<br>2007      | Men<br>2012 | Men<br>2017 | Women<br>2007    | Women<br>2012 | Women<br>2017 |
|---------------------------------------------------|------------------|-------------|-------------|------------------|---------------|---------------|
| <b>Totals, N unweighted, weighted<sup>a</sup></b> | 204,70271        | 245, 84238  | 183, 76438  | 220,66759        | 300, 96257    | 172, 69018    |
| <b>Age, years</b>                                 |                  |             |             |                  |               |               |
| 16-24                                             | 7, 3497          | 20, 5643    | 25, 8197    | 18, 8593         | 55, 15295     | 35, 14084     |
| 25-34                                             | 47, 19528        | 34, 14478   | 32, 17291   | 49, 17849        | 80, 31574     | 55, 25382     |
| 35-44                                             | 63, 21425        | 68, 27822   | 40, 18722   | 66, 15531        | 66, 20741     | 30, 12090     |
| 45-54                                             | 40, 12407        | 62, 19514   | 38, 16023   | 59, 18436        | 65, 18851     | 36, 12713     |
| 55-64                                             | 33, 10115        | 40, 11544   | 37, 13623   | 22, 5006         | 24, 6718      | 10, 3117      |
| 65-74                                             | 14, 3299         | 21, 5235    | 11, 2581    | 6, 1344          | 10, 3077      | 6, 1631       |
| <b>Region</b>                                     |                  |             |             |                  |               |               |
| Lake Geneva                                       | 32, 11958        | 45, 15147   | 46, 19171   | 55, 14654        | 64, 19810     | 43, 16336     |
| Midland                                           | 55, 18173        | 36, 15951   | 18, 8757    | 46, 11811        | 53, 18694     | 38, 18342     |
| Northwest                                         | 18, 6636         | 44, 11119   | 20, 11332   | 33, 11938        | 59, 18221     | 16, 6521      |
| Zurich                                            | 51, 20163        | 51, 24919   | 38, 19435   | 47, 18543        | 41, 21542     | 26, 14769     |
| East                                              | 21, 7228         | 28, 9991    | 27, 10121   | 17, 5365         | 31, 8353      | 20, 6475      |
| Central                                           | 14, 3722         | 34, 5939    | 26, 5903    | 18, 4010         | 37, 6536      | 20, 4442      |
| Ticino                                            | 13, 2391         | 7, 1170     | 8, 1718     | 4, 437           | 15, 3100      | 9, 2133       |
| <b>Highest educational level</b>                  |                  |             |             |                  |               |               |
| No school/ primary                                | 9, 3505          | 19, 4915    | 16, 5477    | 11, 3322         | 28, 8517      | 17, 5036      |
| Secondary                                         | 108, 33417       | 111, 39221  | 83, 32537   | 131, 41629       | 160, 54460    | 83, 33636     |
| Tertiary                                          | 87, 33349        | 115, 40102  | 84, 38423   | 78, 21808        | 112, 33279    | 72, 30346     |
| Missing                                           | 0, 0             | 0, 0        | 0, 0        | 0, 0             | 0, 0          | 0, 0          |
| <b>Income, SFr</b>                                |                  |             |             |                  |               |               |
| No Income                                         | 5, 2205          | 9, 2488     | 12, 3984    | 15, 5635         | 20, 6896      | 8, 2581       |
| <4500                                             | 76, 27183        | 70, 22070   | 64, 26740   | 122, 37141       | 184, 59501    | 106, 44156    |
| 4500-6000                                         | 53, 18533        | 49, 16453   | 45, 19462   | 43, 13094        | 39, 11864     | 31, 10373     |
| >6000                                             | 52, 17628        | 85, 32340   | 50, 20141   | 23, 5677         | 29, 9141      | 22, 9965      |
| Missing                                           | 18, 4723         | 32, 10885   | 12, 6110    | 17, 5212         | 28, 8854      | 5, 1943       |
| <b>Marital status</b>                             |                  |             |             |                  |               |               |
| Single                                            | 131, 44281       | 121, 46054  | 122, 52867  | 118, 33800       | 149, 49696    | 111, 47453    |
| Married                                           | 44, 16380        | 101, 28417  | 18, 5042    | 46, 18141        | 105, 29705    | 22, 7883      |
| Widowed                                           | 0, 0             | 1, 178      | 0, 0        | 4, 839           | 5, 1679       | 2, 428        |
| Divorced                                          | 28, 8496         | 22, 9589    | 14, 5571    | 52, 13978        | 40, 14608     | 14, 5518      |
| Missing                                           | 1, 1113          | 0, 0        | 29, 12956   | 0, 0             | 1, 569        | 23, 7735      |
| <b>Age first intercourse, yrs</b>                 |                  |             |             |                  |               |               |
| <16                                               | 59, 23916        | 94, 34200   | 70, 29812   | 89, 29114        | 162, 50085    | 76, 30797     |
| 16-18                                             | 67, 22018        | 80, 28715   | 64, 26995   | 77, 24899        | 87, 29698     | 53, 22093     |
| 19-25                                             | 67, 21340        | 64, 19584   | 44, 17456   | 48, 11575        | 44, 14199     | 40, 14872     |
| 26-30                                             | 4, 990           | 3, 746      | 3, 1175     | 3, 420           | 1, 183        | 2, 1003       |
| >30                                               | 2, 393           | 0, 0        | 0, 0        | 2, 230           | 2, 830        | 0, 0          |
| Missing                                           | 5, 1613          | 2, 992      | 1, 998      | 1, 521           | 2, 1261       | 1, 254        |
| <b>Sex partners last 12m</b>                      |                  |             |             |                  |               |               |
| 1                                                 | 82, 31018        | 163, 53952  | 89, 36364   | 135, 44408       | 241, 79105    | 106, 44848    |
| 2-4                                               | 67, 22612        | 48, 18743   | 41, 19755   | 37, 10859        | 45, 13384     | 41, 16743     |
| 5+                                                | 29, 10790        | 29, 10335   | 38, 15068   | 14, 3568         | 14, 3767      | 7, 3005       |
| Missing                                           | 26, 5850         | 4, 1208     | 15, 5250    | 34, 7923         | 0, 0          | 18, 2506      |
| <b>Sex frequency last 12m</b>                     | <b>Not asked</b> |             |             | <b>Not asked</b> |               |               |
| 1-2 per year                                      | ..               | 11, 3497    | 13, 3918    | ..               | 22, 6591      | 8, 3402       |
| 1 per month                                       | ..               | 27, 7807    | 26, 10429   | ..               | 32, 10029     | 29, 11156     |
| 2-3 per month                                     | ..               | 51, 16847   | 43, 19311   | ..               | 54, 19159     | 32, 12295     |
| 1 per week                                        | ..               | 58, 16937   | 41, 18896   | ..               | 69, 21662     | 38, 15715     |

|                                           |                  |            |            |                  |            |            |
|-------------------------------------------|------------------|------------|------------|------------------|------------|------------|
| 2-3 per week                              | ..               | 76, 33157  | 39, 16550  | ..               | 83, 27004  | 31, 15140  |
| 4+ per week                               | ..               | 17, 4665   | 7, 2827    | ..               | 33, 10111  | 16, 6888   |
| Missing                                   | ..               | 5, 1327    | 14, 4504   | ..               | 7, 1701    | 18, 4422   |
| <b>Partner type, last intercourse</b>     | <b>Not asked</b> |            |            | <b>Not asked</b> |            |            |
| Stable                                    | ..               | 188, 67115 | 102, 43535 | ..               | 255, 84285 | 137, 54869 |
| Occasional                                | ..               | 53, 16300  | 76, 31278  | ..               | 45, 11972  | 33, 13418  |
| Sex worker                                | ..               | 4, 822     | 5, 1625    | ..               | 0, 0       | 0, 0       |
| Missing                                   | ..               | 0, 0       | 0, 0       | ..               | 0, 0       | 2, 731     |
| <b>HIV testing</b>                        |                  |            |            |                  |            |            |
| Never tested                              | 105, 36157       | 61, 16837  | 37, 12357  | 141, 42611       | 81, 27912  | 56,21757   |
| >12m ago                                  | 51, 17619        | 111, 40139 | 80, 33188  | 48, 13631        | 158, 48215 | 80, 33248  |
| Within last 12m                           | 44, 15623        | 66, 24807  | 61, 28525  | 28, 9144         | 52, 16840  | 36, 14012  |
| Missing                                   | 4, 871           | 7, 2454    | 5, 2367    | 3, 1373          | 9, 3289    | 0, 0       |
| <b>Alcohol</b>                            |                  |            |            |                  |            |            |
| No use                                    | 19, 4496         | 28, 8021   | 13, 4645   | 21, 7475         | 33, 10778  | 24, 10064  |
| Daily                                     | 39, 14549        | 37, 12283  | 30, 10228  | 24, 6480         | 24, 7291   | 11, 4582   |
| Weekly                                    | 104, 35320       | 137, 48188 | 101, 46129 | 116, 34066       | 161, 49932 | 93, 36322  |
| Monthly                                   | 42, 15906        | 43, 15746  | 39, 15436  | 58, 18487        | 82, 28256  | 44, 18050  |
| Missing                                   | 0, 0             | 0, 0       | 0, 0       | 1, 252           | 0, 0       | 0, 0       |
| <b>Tobacco</b>                            |                  |            |            |                  |            |            |
| Non-smoker                                | 110, 40849       | 141, 48931 | 106, 45271 | 106, 30958       | 143, 49064 | 84, 34367  |
| Casual smoker                             | 26, 7455         | 31, 11905  | 18, 5952   | 22, 6517         | 51, 16581  | 19, 7859   |
| Daily smoker                              | 68, 21966        | 73, 23402  | 59, 25215  | 92, 29284        | 106, 30611 | 69, 26792  |
| Missing                                   | 0, 0             | 0, 0       | 0, 0       | 0, 0             | 0, 0       | 0, 0       |
| <b>Cannabis<sup>b</sup></b>               |                  |            |            |                  |            |            |
| No use                                    | 97, 28824        | 129, 42310 | 94, 38959  | 89, 25715        | 103, 33352 | 74, 28862  |
| >12m ago                                  | 66, 27309        | 74, 25507  | 56, 25133  | 94,28964         | 133, 44220 | 65, 26828  |
| Within last 12m                           | 31, 10391        | 40, 15510  | 31, 11225  | 34,10532         | 64, 18685  | 31, 12594  |
| Missing                                   | 97, 28824        | 2, 910     | 2, 1121    | 3,1547           | 0          | 2, 734     |
| <b>Other illicit drugs<sup>b, c</sup></b> |                  |            |            |                  |            |            |
| No use                                    | 149, 28824       | 185, 60328 | 148, 62088 | 169, 51011       | 234, 75008 | 136, 53648 |
| Any use                                   | 46,17345         | 57, 23152  | 35, 14350  | 51, 15748        | 66, 21248  | 36, 15370  |
| Missing                                   | 9, 3469          | 3, 757     | 0, 0       | 0, 0             | 0, 0       | 0, 0       |

- Overall denominators for condom use and HIV testing differ because eligibility criteria for answering each question differed;
- In 2007 questions about drugs were only asked to people between 15 to 69 years;
- Combines use of ecstasy, cocaine, or heroin and combines categories of use more than 12 months ago and use within last 12 months.

Abbreviations: m, months; SFr, Swiss Francs; yrs, years; ..., question not asked

Table S7. Prevalence of condom use, men reporting any same-sex partner 2007, 2012, 2017 and associations with sociodemographic factors, sexual behaviours and substance use from univariable logistic regression, and multivariable logistic regression, 2007 and, 2012, 2017

| Condom Use                                 | 2007                | 2007                   | 2007                              | 2012                | 2012                   | 2017                | 2017                   | Adjusted OR                       |
|--------------------------------------------|---------------------|------------------------|-----------------------------------|---------------------|------------------------|---------------------|------------------------|-----------------------------------|
|                                            | Prevalence (95% CI) | Unadjusted OR (95% CI) | Adjusted OR (95% CI) <sup>a</sup> | Prevalence (95% CI) | Unadjusted OR (95% CI) | Prevalence (95% CI) | Unadjusted OR (95% CI) | Adjusted OR (95% CI) <sup>a</sup> |
| <b>Year<sup>a</sup></b>                    |                     |                        |                                   |                     |                        |                     |                        | p=0.06                            |
| 2007                                       | 40 (31-49)          | -                      | -                                 | -                   | -                      | -                   | -                      | ..                                |
| 2012                                       | -                   | -                      | -                                 | 43 (34-53)          | -                      | -                   | -                      | reference                         |
| 2017                                       | -                   | -                      | -                                 | -                   | -                      | 54 (46-63)          | -                      | 1.80 (0.97, 3.34)                 |
| <b>Age, years</b>                          |                     | P=0.038                | p=0.057                           |                     | p<0.001                |                     | p<0.001                | p<0.001                           |
| Median (IQR) <sup>b</sup>                  | 36 (30-44)          | 0.97 (0.94-1.00)       | 0.97 (0.93, 1.00)                 | 38 (29- 47)         | 0.95 (0.92, 0.97)      | 37 (26-48)          | 0.95 (0.93, 0.98)      | 0.96 (0.94, 0.98)                 |
| 16-24                                      | 93 (00-100)         | ..                     | ..                                | 83 (52-98)          | ..                     | 81 (57-95)          | ..                     | ..                                |
| 25-34                                      | 36 (22-53)          | ..                     | ..                                | 44 (25-64)          | ..                     | 58 (37-78)          | ..                     | ..                                |
| 35-44                                      | 56 (39-71)          | ..                     | ..                                | 28 (16-42)          | ..                     | 66 (49-81)          | ..                     | ..                                |
| 45-54                                      | 16 (08-30)          | ..                     | ..                                | 32 (19-47)          | ..                     | 47 (28-66)          | ..                     | ..                                |
| 55-64                                      | 34 (15-59)          | ..                     | ..                                | 20 (7-38)           | ..                     | 35 (18-56)          | ..                     | ..                                |
| 65-74                                      | 36 (11-72)          | ..                     | ..                                | 18 (3-46)           | ..                     | 9 (0-49)            | ..                     | ..                                |
| <b>Region</b>                              |                     | p=0.9                  |                                   |                     | p=0.4                  |                     | p=0.9                  |                                   |
| Lake Geneva                                | 37 (19-58)          | reference              | ..                                | 31 (18-47)          | reference              | 55 (39-70)          | reference              | ..                                |
| Midland                                    | 44 (25-65)          | 1.36 (0.43, 4.36)      | ..                                | 22 (09-42)          | 0.62 (0.20, 1.98)      | 54 (27-80)          | 0.99 (0.29, 3.32)      | ..                                |
| Northwest                                  | 33 (10-63)          | 0.84 (0.20, 3.55)      | ..                                | 28 (13-47)          | 0.86 (0.30, 2.49)      | 58 (32-81)          | 1.12 (0.35, 3.55)      | ..                                |
| Zurich                                     | 41 (25-58)          | 1.17 (0.40, 3.44)      | ..                                | 44 (29-59)          | 1.69 (0.68, 4.21)      | 51 (33-69)          | 0.86 (0.33, 2.21)      | ..                                |
| East                                       | 34 (12-63)          | 0.89 (0.22, 3.60)      | ..                                | 41 (18-66)          | 1.5 (0.44, 5.04)       | 51 (27-75)          | 0.85 (0.27, 2.64)      | ..                                |
| Central                                    | 66 (25-94)          | 3.28 (0.56, 19.2)      | ..                                | 23 (10-41)          | 0.65 (0.21, 1.95)      | 64 (41-83)          | 1.47 (0.49, 4.42)      | ..                                |
| Ticino                                     | 36 (6-77)           | 0.94 (0.16, 5.72)      | ..                                | 48 (6-93)           | 2.06 (0.32, 13.4)      | 57 (15-92)          | 1.09 (0.21, 5.71)      | ..                                |
| <b>Highest education level</b>             |                     | p=0.09                 |                                   |                     | p=0.2                  |                     | p=0.5                  |                                   |
| No school/primary                          | 87 (68-105)         | reference              | ..                                | 47 (13-83)          | reference              | 67 (13-83)          | reference              | ..                                |
| Secondary                                  | 43 (30-55)          | 0.12 (0.02, 0.61)      | ..                                | 27 (18-38)          | 0.41 (0.10, 1.71)      | 50 (18-37)          | 0.51 (0.14, 1.82)      | ..                                |
| Tertiary                                   | 34 (23-46)          | 0.08 (0.02, 0.42)      | ..                                | 38 (28-50)          | 0.7 (0.17, 2.84)       | 56 (28-50)          | 0.64 (0.18, 2.29)      | ..                                |
| <b>Income, SFr</b>                         |                     | p=0.075                |                                   |                     | p=0.2                  |                     | P=>0.9                 |                                   |
| No Income                                  |                     | 17.6 (1.53, 203)       | ..                                | 60 (0-100)          | 2.88 (0.53, 15.5)      | 46 (97-86)          | 0.72 (0.18, 2.93)      | ..                                |
| <4500                                      |                     | reference              | ..                                | 34 (20-51)          | reference              | 54 (40-69)          | reference              | ..                                |
| 4500-6000                                  |                     | 0.69 (0.27, 1.76)      | ..                                | 42 (27-60)          | 1.41 (0.54, 3.72)      | 57 (39-74)          | 1.1 (0.44, 2.76)       | ..                                |
| >6000                                      |                     | 0.88 (0.36, 2.14)      | ..                                | 27 (17-39)          | 0.71 (0.29, 1.73)      | 57 (41-72)          | 1.1 (0.48, 2.55)       | ..                                |
| <b>Marital Status</b>                      |                     | p<0.001                |                                   |                     | p=<0.001               |                     | p=0.001                |                                   |
| Single                                     | 54 (42-65)          | 3.98 (1.53, 10.4)      | ..                                | 38 (28-49)          | 1.88 (0.89, 3.98)      | 65 (54-74)          | 12.4 (3.00, 51.2)      | ..                                |
| Married                                    | 23 (10-40)          | reference              | ..                                | 25 (15-37)          | reference              | 13 (3-42)           | reference              | ..                                |
| Widowed                                    | ..                  | ..                     | ..                                | ..                  | ..                     | ..                  | ..                     | ..                                |
| Divorced                                   | 14 (4-30)           | 0.54 (0.15, 1.96)      | ..                                | 39 (15-69)          | 2.12 (0.59, 7.69)      | 44 (14-79)          | 5.30 (0.82, 34.1)      | ..                                |
| <b>Age first sexual intercourse, years</b> |                     | p=0.6                  |                                   |                     | p=0.2                  |                     | p=0.4                  |                                   |
| Median (IQR)                               | 17 (15-19)          | 0.97 (0.88, 1.07)      | ..                                | 17 (16-19)          | 0.93 (0.84, 1.05)      | 17 (16-18)          | 1.04 (0.94, 1.16)      | ..                                |
| <b>Sex partners 12m</b>                    |                     | p=0.05                 | p=0.005                           |                     | p<0.001                |                     | p<0.001                |                                   |
| 1                                          | 22 (10-38)          | reference              | reference                         | 18 (12-26)          | reference              | 31 (20-44)          | reference              | Reference                         |
| 2-4                                        | 53 (38-68)          | 4.09 (1.52, 11.0)      | 4.35 (1.64, 11.6)                 | 47 (27-67)          | 3.86 (1.51, 9.87)      | 71 (52-86)          | 5.55 (2.02, 15.2)      | 1.94 (0.85, 4.42)                 |
| 5+                                         | 64 (39-84)          | 6.3 (1.80, 22.1)       | 5.42 (1.50, 19.6)                 | 84 (59-97)          | 22.6 (5.56, 91.9)      | 86 (72-95)          | 13.4 (4.62, 38.6)      | 5.83 (2.07, 16.40)                |
| <b>Average sex frequency 12 m</b>          | Not asked           |                        |                                   |                     | p=0.030                |                     | p=0.006                |                                   |
| 1-2 times per year                         | ..                  | ..                     | ..                                | 75 (12-100)         | 3.10 (0.54, 18.0)      | 93 (68-100)         | 7.55 (1.08, 52.5)      | ..                                |

|                                             |            |                   |    |            |                   |            |                   |                    |
|---------------------------------------------|------------|-------------------|----|------------|-------------------|------------|-------------------|--------------------|
| Once per month                              | ..         | ..                | .. | 50 (26-74) | reference         | 65 (39-85) | reference         | ..                 |
| 2-3 per month                               | ..         | ..                | .. | 32 (17-50) | 0.47 (0.14, 1.55) | 64 (46-79) | 0.96 (0.29, 3.15) | ..                 |
| Once per week                               | ..         | ..                | .. | 37 (22-53) | 0.58 (0.19, 1.83) | 42 (24-62) | 0.4 (0.12, 1.38)  | ..                 |
| 2-3t/week                                   | ..         | ..                | .. | 25 (15-37) | 0.33 (0.11, 1.00) | 36 (20-55) | 0.31 (0.09, 1.05) | ..                 |
| 4>/week                                     | ..         | ..                | .. | 17 (3-42)  | 0.20 (0.04, 0.92) | 77 (0-100) | 1.78 (0.20, 15.8) | ..                 |
| <b>Type of partner last sex intercourse</b> | Not asked  |                   |    |            | p<0.001           |            | p<0.001           | p<0.001            |
| Stable partner                              | ..         | ..                | .. | 23 (16-31) | reference         | 33 (23-45) | reference         | Reference          |
| Occasional partner                          | ..         | ..                | .. | 74 (58-87) | 9.85 (4.14, 23.5) | 83 (73-90) | 9.81 (4.46, 21.6) | 5.98 (2.77, 12.90) |
| Sex-worker                                  | ..         | ..                | .. | 88 (0-100) | 25.1 (2.35, 270)  | 75 (0-100) | 5.94 (0.61, 57.5) | 8.29 (1.18, 58.30) |
| <b>HIV Testing</b>                          |            | p=0.051           |    |            | p<0.001           |            | p<0.001           |                    |
| Never tested                                | 31 (21-42) | reference         | .. | 23 (10-39) | reference         | 57 (36-75) | reference         | ..                 |
| Tested >2m                                  | 44 (26-63) | 1.79 (0.73, 4.37) | .. | 24 (15-34) | 1.08 (0.41, 2.87) | 43 (30-56) | 0.57 (0.22, 1.47) | ..                 |
| Tested in last 12m                          | 61 (42-77) | 3.48 (1.46, 8.30) | .. | 58 (42-73) | 4.76 (1.70, 13.3) | 63 (48-76) | 1.46 (0.55, 3.90) | ..                 |
| <b>Alcohol</b>                              |            | p=0.9             |    |            | p=0.001           |            | p=0.3             |                    |
| No use                                      | 42 (15-72) | reference         | .. | 61 (37-82) | reference         | 70 (33-94) | reference         | ..                 |
| Daily                                       | 35 (18-55) | 0.76 (0.20, 2.83) | .. | 12 (4-27)  | 0.09 (0.02, 0.34) | 40 (21-61) | 0.29 (0.07, 1.28) | ..                 |
| Weekly                                      | 43 (31-56) | 1.07 (0.32, 3.65) | .. | 39 (28-49) | 0.4 (0.15, 1.10)  | 55 (44-66) | 0.53 (0.14, 2.03) | ..                 |
| Monthly                                     | 40 (22-61) | 0.95 (0.25, 3.65) | .. | 20 (9-37)  | 0.16 (0.05, 0.56) | 58 (38-76) | 0.6 (0.14, 2.61)  | ..                 |
| <b>Tobacco</b>                              |            | p= 0.031          |    |            | p=0.6             |            | p=0.2             |                    |
| Non-smoker                                  | 33 (23-44) | reference         | .. | 34 (24-44) | reference         | 55 (44-66) | reference         | ..                 |
| Casual smoker                               | 58 (33-81) | 2.87 (1.00, 8.27) | .. | 25 (9-47)  | 0.66 (0.22, 1.95) | 74 (44-93) | 2.26 (0.71, 7.19) | ..                 |
| Daily smoker                                | 50 (33-67) | 2.02 (0.88, 4.64) | .. | 38 (25-51) | 1.2 (0.59, 2.41)  | 48 (33-64) | 0.76 (0.36, 1.63) | ..                 |
| <b>Cannabis<sup>c</sup></b>                 |            | p= 0.031          |    |            | p=0.9             |            | p=0.8             |                    |
| No use                                      | 40 (28-53) | reference         | .. | 32 (23-42) | reference         | 51 (40-63) | reference         | ..                 |
| >12m ago                                    | 32 (18-49) | 0.71 (0.30, 1.69) | .. | 35 (22-49) | 1.14 (0.55, 2.38) | 56 (41-71) | 1.22 (0.56-2.68)  | ..                 |
| Within last 12m                             | 65 (43-84) | 2.84 (1.04, 7.78) | .. | 32 (15-53) | 1.01 (0.38, 2.64) | 58 (37-78) | 1.32 (0.51-3.39)  | ..                 |
| <b>Other illicit drugs<sup>b, c</sup></b>   |            | p= 0.089          |    |            | p=0.2             |            | p=0.5             |                    |
| No use                                      | 37 (27-48) | reference         | .. | 36 (28-45) | reference         | 53 (44-62) | reference         | ..                 |
| Any use                                     | 54 (36-71) | 2.04 (0.89, 4.68) | .. | 26 (13-41) | 0.61 (0.27, 1.37) | 60 (41-77) | 1.31 (0.58,3.10)  | ..                 |

- a. Prevalence of condom use for 2007 included. Multivariable model only includes 2012 and 2017 because denominator for 2007 excluded men who had never used a condom. Multivariable model includes age, number of sex partners and type of partner, p value from Wald test;
- b. Median age of the proportion who used a condom;
- c. In 2007 questions about drugs were only asked to people between 15 to 69 years;
- d. Combines use of ecstasy, cocaine, or heroin and combines categories of use more than 12 months ago and use within last 12 months.

Abbreviations: CI, confidence interval; IQR, interquartile range; m, months; OR odds ratio; CHF, Swiss Francs; yrs, years; .., variable not included in multivariable model.

Table S8. Condom use in men reporting any same-sex partner 2012, 2017. Multivariable logistic regression 2017 including marital status.

| Condom Use-MSM                       | 2012                   | 2017                   | Adjusted OR (95% CI) <sup>a</sup> |
|--------------------------------------|------------------------|------------------------|-----------------------------------|
|                                      | Unadjusted OR (95% CI) | Unadjusted OR (95% CI) |                                   |
| <b>Year</b>                          |                        |                        | p=0.15                            |
| 2012                                 | -                      | -                      | reference                         |
| 2017                                 | -                      | -                      | 1.64 (0.83, 3.24)                 |
| <b>Age, years</b>                    | p<0.001                | p<0.001                | p<0.001                           |
|                                      | 0.95 (0.92, 0.97)      | 0.95 (0.93, 0.98)      | 0.95 (0.92, 0.98)                 |
| <b>Marital Status</b>                | p=<0.001               | p=0.001                | p=<0.001                          |
| Single                               | 1.88 (0.89, 3.98)      | 12.4 (3.00, 51.2)      | 1.15 (0.50, 2.65)                 |
| Married                              | reference              | reference              | reference                         |
| Widowed                              | -                      | -                      | -                                 |
| Divorced                             | 2.12 (0.59, 7.69)      | 5.30 (0.82, 34.1)      | 2.42 (0.71, 8.28)                 |
| <b>Sex partners last 12m</b>         | p<0.001                | p<0.001                |                                   |
| 1                                    | reference              | reference              | reference                         |
| 2-4                                  | 3.86 (1.51, 9.87)      | 5.55 (2.02, 15.2)      | 1.86 (0.78, 4.48)                 |
| 5+                                   | 22.6 (5.56, 91.9)      | 13.4 (4.62, 38.6)      | 4.81 (1.66, 13.9)                 |
| <b>Partner type last intercourse</b> | p<0.001                | p<0.001                |                                   |
| Stable                               | reference              | reference              | reference                         |
| Occasional                           | 9.85 (4.14, 23.5)      | 9.81 (4.46, 21.6)      | 6.71 (2.84, 15.8)                 |
| Sex worker                           | 25.1 (2.35, 270)       | 5.94 (0.61, 57.5)      | 11.5 (1.42, 93.4)                 |

Multivariable model includes age, number of sex partners and type of partner, p value from Wald test.

Abbreviations: CI, confidence interval; OR odds ratio; CHF, Swiss Francs; yrs, years;

Table S9. Condom use, women reporting any same-sex partner. Associations with sociodemographic factors, sexual behaviours and substance use from univariable logistic regression, 2007, 2012, 2017 and from multivariable logistic regression 2007 and multivariable logistic regression 2012, 2017.

| Condom Use                           | 2007                |                        |                                   | 2012                |                        |                                   | 2017                |                        |                                   |
|--------------------------------------|---------------------|------------------------|-----------------------------------|---------------------|------------------------|-----------------------------------|---------------------|------------------------|-----------------------------------|
|                                      | Prevalence (95 CI%) | Unadjusted OR (95% CI) | Adjusted OR (95% CI) <sup>a</sup> | Prevalence (95 CI%) | Unadjusted OR (95% CI) | Adjusted OR (95% CI) <sup>a</sup> | Prevalence (95 CI%) | Unadjusted OR (95% CI) | Adjusted OR (95% CI) <sup>a</sup> |
|                                      | 22 (15-29)          |                        |                                   |                     |                        |                                   |                     |                        |                                   |
| <b>Age, years</b>                    |                     | p=0.025                | p=0.12                            |                     | p=0.009                |                                   | p<0.001             | p=0.011                |                                   |
| Median (IQR) <sup>b</sup>            | 31 (24-43)          | 0.96 (0.92, 0.99)      | 0.97 (0.92, 1.01)                 | 30 (22-41)          | 0.96 (0.93, 0.99)      |                                   | 26 (23-31)          | 0.92 (0.88, 0.96)      | 0.96 (0.94, 0.98)                 |
| 16-24                                | 51 (22-79)          | ..                     | ..                                | 49 (33-66)          | ..                     |                                   | 39 (21-60)          | ..                     | ..                                |
| 25-34                                | 29 (17-45)          | ..                     | ..                                | 28 (17-42)          | ..                     |                                   | 35 (22-51)          | ..                     | ..                                |
| 35-44                                | 13 (7-22)           | ..                     | ..                                | 22 (12-35)          | ..                     |                                   | 18 (7-40)           | ..                     | ..                                |
| 45-54                                | 11 (5-21)           | ..                     | ..                                | 18 (9-32)           | ..                     |                                   | 5 (1-16)            | ..                     | ..                                |
| 55-64                                | 26 (9-57)           | ..                     | ..                                | 19 (3-51)           | ..                     |                                   | 0 (0-0)             | ..                     | ..                                |
| 65-74                                | 17 (0-91)           | ..                     | ..                                | 6 (0-69)            | ..                     |                                   | 11 (0-0)            | ..                     | ..                                |
| <b>Highest educational level</b>     |                     | p=0.7                  |                                   |                     | p=0.6                  |                                   | p=0.5               |                        |                                   |
| No school/primary                    | 15 (9-39)           | reference              | ..                                | 37 (16-62)          | reference              |                                   | 38 (10-73)          | reference              | ..                                |
| Secondary                            | 24 (15-34)          | 1.83 (0.26, 13.0)      | ..                                | 25 (17-34)          | 0.57 (0.21, 1.58)      |                                   | 27 (17-39)          | 0.61 (0.16, 2.30)      | ..                                |
| Tertiary                             | 20 (10-30)          | 1.42 (0.19, 10.4)      | ..                                | 27 (18-38)          | 0.64 (0.22, 1.81)      |                                   | 21 (11-33)          | 0.44 (0.11, 1.69)      | ..                                |
| <b>Income, SFr</b>                   |                     | p=0.8                  |                                   |                     | p=0.025                |                                   | p=0.9               |                        |                                   |
| No Income                            | 20 (0-43)           | 0.96 (0.20, 4.70)      | ..                                | 10 (1-30)           | 0.28 (0.07, 1.10)      |                                   | 35 (3-83)           | 1.58 (0.33, 7.64)      | ..                                |
| <4500                                | 21 (11-30)          | reference              | ..                                | 29 (21-37)          | reference              |                                   | 26 (17-36)          | reference              | ..                                |
| 4500-6000                            | 23 (9-37)           | 1.14 (0.43, 3.06)      | ..                                | 32 (17-52)          | 0.57 (0.21, 1.58)      |                                   | 23 (7-46)           | 0.61 (0.16, 2.30)      | ..                                |
| >6000                                | 32 (6-57)           | 1.79 (0.49, 6.52)      | ..                                | 8 (2-21)            | 0.64 (0.22, 1.81)      |                                   | 21 (6-47)           | 0.44 (0.11, 1.69)      | ..                                |
| <b>Marital Status</b>                |                     | p<0.001                |                                   |                     | p<0.001                |                                   | p<0.001             |                        |                                   |
| Single                               | 33 (22-44)          | 4.62 (1.43, 14.9)      | ..                                | 39 (30-49)          | 4.36 (2.05, 9.27)      |                                   | 40 (17-69)          | 0.55 (0.17, 1.74)      | ..                                |
| Married                              | 10 (0-19)           | reference              | ..                                | 13 (7-22)           | reference              |                                   | 0 (0-0)             | reference              | ..                                |
| Widowed                              | (0-0)               | -                      | ..                                | 16 (0-46)           | 1.29 (0.12, 13.3)      |                                   | 11 (2-47)           | -                      | ..                                |
| Divorced                             | 15 (5-24)           | 1.59 (0.42, 6.04)      | ..                                | 15 (6-35)           | 1.39 (0.39, 5.02)      |                                   | 40 (17-69)          | 0.18 (0.03, 1.06)      | ..                                |
| <b>Age first intercourse, yrs</b>    |                     | p=0.8                  |                                   |                     | p=0.043                |                                   | p=0.11              |                        |                                   |
| Median (IQR) <sup>b</sup>            | 17 (15-18)          | 1.02 (0.89, 1.16)      | ..                                | 16 (15-17)          | 0.86 (0.74, 0.99)      |                                   | 16 (14-18)          | 0.89 (0.77, 1.03)      | ..                                |
| <b>Sex partners last 12m</b>         |                     | p<0.001                | p=0.005                           |                     | p<0.001                |                                   | p<0.001             | p<0.001                |                                   |
| 1                                    | 12 (06-19)          | reference              | reference                         | 20 (14-27)          | reference              |                                   | 11 (5-20)           | reference              | reference                         |
| 2-4                                  | 45 (24-66)          | 5.94 (2.07, 17.1)      | 4.70 (1.55, 14.3)                 | 61 (43-78)          | 6.49 (2.83, 14.9)      |                                   | 51 (33-70)          | 8.25 (2.98, 22.8)      | 5.96 (3.12, 11.4)                 |
| 5+                                   | 57 (17-90)          | 9.66 (2.26, 41.3)      | 7.41 (1.42, 38.6)                 | 56 (17-89)          | 5.11 (1.26, 20.7)      |                                   | 55 (5-97)           | 9.35 (1.64, 53.3)      | 4.99 (1.58, 15.7)                 |
| <b>Sex frequency last 12m</b>        | Not asked           | Not asked              |                                   |                     | p=0.005                |                                   | p=0.08              |                        |                                   |
| 1-2 per year                         | ..                  | ..                     | ..                                | 40 (16-69)          | reference              |                                   | 29 (0-97)           | reference              | ..                                |
| 1 per month                          | ..                  | ..                     | ..                                | 40 (20-62)          | 1.03 (0.27, 3.93)      |                                   | 19 (5-41)           | 1.75 (0.20, 15.6)      | ..                                |
| 2-3 per month                        | ..                  | ..                     | ..                                | 43 (26-61)          | 1.13 (0.38, 3.38)      |                                   | 30 (13-51)          | 1.82 (0.44, 7.57)      | ..                                |
| 1 per week                           | ..                  | ..                     | ..                                | 19 (10-31)          | 0.35 (0.12, 1.03)      |                                   | 31 (15-51)          | 1.98 (0.49, 7.99)      | ..                                |
| 2-3 per week                         | ..                  | ..                     | ..                                | 12 (5-21)           | 0.2 (0.07, 0.61)       |                                   | 17 (5-35)           | 0.87 (0.19, 3.97)      | ..                                |
| 4+ per week                          | ..                  | ..                     | ..                                | 36 (17-57)          | 1.03 (0.27, 3.93)      |                                   | 18 (1-57)           | 1.75 (0.20, 15.6)      | ..                                |
| <b>Partner type last intercourse</b> | Not asked           | Not asked              |                                   |                     | p<0.001                |                                   | p<0.001             |                        |                                   |
| Stable                               | ..                  | ..                     | ..                                | 20 (15-27)          | reference              |                                   | 15 (9-23)           | reference              | ..                                |
| Occasional                           | ..                  | ..                     | ..                                | 72 (56-85)          | 10.2 (4.49, 23.1)      |                                   | 68 (45-87)          | 12.5 (4.12, 38.0)      | ..                                |
| Sex worker                           | ..                  | ..                     | ..                                | 0 (0-0)             | -                      |                                   | 0 (0-0)             | -                      | ..                                |
| <b>HIV testing</b>                   |                     | p=0.11                 |                                   |                     | p=0.9                  |                                   | p=0.2               |                        |                                   |
| Never tested                         | 17 (11-25)          | reference              | ..                                | 28 (17-41)          | reference              |                                   | 24 (12-39)          | reference              | ..                                |
| Tested >12-m                         | 28 (15-45)          | 1.91 (0.79, 4.63)      | ..                                | 29 (20-38)          | 1.06 (0.50, 2.23)      |                                   | 20 (11-32)          | 0.82 (0.31, 2.20)      | ..                                |
| Tested in last 12m                   | 37 (15-65)          | 2.89 (0.92, 9.08)      | ..                                | 25 (13-40)          | 0.87 (0.34, 2.22)      |                                   | 39 (21-59)          | 2.03 (0.69, 5.95)      | ..                                |
| <b>Alcohol</b>                       |                     | p=0.6                  |                                   |                     | p=0.6                  |                                   | p=0.074             |                        |                                   |
| No use                               | 21 (02-61)          | reference              | ..                                | 24 (10-43)          | reference              |                                   | 9 (2-23)            | reference              | ..                                |
| Daily                                | 14 (03-36)          | 0.59 (0.07, 5.10)      | ..                                | 13 (1-44)           | 0.46 (0.06, 3.48)      |                                   | 26 (1-76)           | 3.3 (0.46, 23.8)       | ..                                |
| Weekly                               | 26 (17-36)          | 1.29 (0.21, 7.91)      | ..                                | 30 (22-39)          | 1.39 (0.53, 3.65)      |                                   | 32 (22-44)          | 4.54 (1.37, 15.0)      | ..                                |
| Monthly                              | 19 (09-32)          | 0.85 (0.13, 5.71)      | ..                                | 25 (14-39)          | 1.08 (0.36, 3.27)      |                                   | 19 (8-35)           | 2.25 (0.57, 8.87)      | ..                                |
| <b>Tobacco</b>                       |                     | p=0.7                  |                                   |                     | p=0.14                 |                                   | p=0.022             |                        |                                   |
| Non-smoker                           | 21 (13-31)          | reference              | ..                                | 21 (13-30)          | reference              |                                   | 14 (7-24)           | reference              | ..                                |
| Casual smoker                        | 31 (10-61)          | 1.69 (0.51, 5.61)      | ..                                | 37 (22-53)          | 2.22 (0.95, 5.21)      |                                   | 39 (13-70)          | 3.79 (1.07, 13.5)      | ..                                |
| Daily smoker                         | 22 (12-34)          | 1.02 (0.44, 2.37)      | ..                                | 32 (21-43)          | 1.78 (0.85, 3.72)      |                                   | 35 (22-49)          | 3.21 (1.29, 7.95)      | ..                                |
| <b>Cannabis<sup>c</sup></b>          |                     | p=0.7                  |                                   |                     | p=0.069                |                                   | p=0.038             |                        |                                   |



|                                          |            |                   |    |            |                   |            |                   |    |
|------------------------------------------|------------|-------------------|----|------------|-------------------|------------|-------------------|----|
| No use                                   | 17 (10-27) | reference         | .. | 23 (15-34) | reference         | 16 (8-28)  | reference         | .. |
| >12m ago                                 | 24 (14-36) | 1.49 (0.62, 3.57) | .. | 23 (15-34) | 1 (0.47, 2.13)    | 26 (15-39) | 1.82 (0.68, 4.88) | .. |
| Within last 12m                          | 30 (14-52) | 2.09 (0.72, 6.11) | .. | 41 (27-57) | 2.3 (1.04, 5.06)  | 45 (24-67) | 4.27 (1.39, 13.1) | .. |
| <b>Other illicit drugs<sup>c,d</sup></b> |            | p=0.09            |    |            | p=0.2             |            | p=0.6             |    |
| No use                                   | 19 (12-26) | reference         | .. | 25 (18-32) | reference         | 42 (16-32) | reference         | .. |
| Any used                                 | 34 (16-51) | 2.17 (0.88, 5.37) | .. | 35 (20-49) | 1.61 (0.78, 3.34) | 29 (12-46) | 0.48, 3.30)       | .. |

- Multivariable models separate for 2007 and 2012, 2017 because denominator for 2007 excluded women who had never used a condom. Multivariable models include age, number of sex partners and type of partner; p value from Wald test;
- Median age of the proportion who used a condom;
- In 2007 questions about drugs were only asked to people between 15 to 69 years;
- Combines use of ecstasy, cocaine, or heroin and combines categories of use more than 12 months ago and use within last 12 months.

Abbreviations: CI, confidence interval; IQR, interquartile range; m, months; OR, odds ratio; SFr, Swiss Francs; yrs, years; .., variable not included in multivariable model.

Table S10. Lifetime HIV testing, men and women with only opposite-sex partners. Denominators, unweighted and weighted, for each survey and variable

| HIV testing                                       | Men             | Men           | Men           | Women         | Women         | Women         |
|---------------------------------------------------|-----------------|---------------|---------------|---------------|---------------|---------------|
|                                                   | 2007            | 2012          | 2017          | 2007          | 2012          | 2017          |
| <b>Totals, N unweighted, weighted<sup>a</sup></b> | 6236, 2237900   | 7063, 2313010 | 7975, 2702130 | 7582, 2289504 | 6763, 2049462 | 8330, 2529129 |
| <b>Age, years</b>                                 |                 |               |               |               |               |               |
| 16-24                                             | 553, 296239     | 949, 290087   | 901, 300476   | 524, 248000   | 843, 255515   | 874, 258899   |
| 25-34                                             | 955, 384253     | 1040, 446058  | 1104, 525416  | 1183, 402818  | 1100, 419164  | 1278, 505920  |
| 35-44                                             | 1506, 505797    | 1402, 465779  | 1436, 525957  | 1753, 521670  | 1511, 471335  | 1604, 509388  |
| 45-54                                             | 1184, 441374    | 1629, 529873  | 1842, 566707  | 1344, 446311  | 1681, 504578  | 1921, 558324  |
| 55-64                                             | 1181, 365700    | 1179, 363623  | 1505, 461133  | 1532, 401480  | 1049, 307860  | 1592, 434936  |
| 65-74                                             | 857, 244536     | 864, 234265   | 1187, 322440  | 1246, 269225  | 579, 173550   | 1061, 290492  |
| <b>Region</b>                                     |                 |               |               |               |               |               |
| Lake Geneva                                       | 1165, 413941    | 1255, 421571  | 1412, 504218  | 1416, 429093  | 1223, 407290  | 1526, 479185  |
| Midland                                           | 1651, 506532    | 1375, 521007  | 1563, 582248  | 2011, 519597  | 1332, 472081  | 1717, 593088  |
| Northwest                                         | 657, 299390     | 984, 312365   | 842, 350702   | 806, 319638   | 944, 291493   | 889, 351691   |
| Zurich                                            | 812, 398380     | 710, 397487   | 873, 485356   | 935, 386575   | 648, 344353   | 915, 443955   |
| East                                              | 711, 334068     | 1067, 356147  | 1510, 385186  | 789, 304118   | 962, 300103   | 1477, 341979  |
| Central                                           | 806, 202729     | 1175, 222817  | 1222, 273641  | 1032, 233854  | 1157, 217857  | 1240, 241036  |
| Ticino                                            | 434, 82861      | 1255, 421571  | 1412, 504218  | 593, 96630    | 497, 98827    | 566, 107024   |
| <b>Highest education level</b>                    |                 |               |               |               |               |               |
| No school/primary                                 | 613, 255693     | 808, 262368   | 941, 289892   | 1182, 347612  | 857, 275746   | 1019, 288781  |
| Secondary                                         | 3443, 1220851   | 3436, 1132883 | 3756, 1256566 | 5039, 1523082 | 4163, 1283197 | 4726, 1400556 |
| Tertiary                                          | 2179, 761150    | 2803, 930103  | 3264, 1151381 | 1358, 417617  | 1725, 567319  | 2566, 860448  |
| Missing                                           | 1, 206          | 16, 4330      | 14,4291       | 3,1193        | 18, 5740      | 19, 8173      |
| <b>Income, SFr</b>                                |                 |               |               |               |               |               |
| No income                                         | 149, 64349      | 244, 75987    | 342, 111526   | 889, 294891   | 888, 279067   | 963, 271987   |
| <4500                                             | 2134, 789202    | 2253, 759570  | 2660, 910239  | 4367, 1346627 | 3897, 1221547 | 4896, 1466363 |
| 4500-6000                                         | 1520, 523117    | 1648, 549727  | 1881, 649750  | 862, 241467   | 699, 222686   | 1042, 356014  |
| >6000                                             | 1769, 630922    | 2154, 697210  | 2503, 842885  | 407, 109029   | 443, 132703   | 732, 251417   |
| Missing                                           | 664, 230310     | 764, 247191   | 589,187729    | 1057,297489   | 836, 276000   | 697, 212177   |
| <b>Marital status</b>                             |                 |               |               |               |               |               |
| Single                                            | 1790, 702281    | 2230, 829308  | 2397, 991450  | 1776, 572834  | 1751, 585228  | 2247, 795789  |
| Married                                           | 3600, 1323818   | 4208, 1263895 | 4859, 1430224 | 4065, 1353870 | 4226, 1262541 | 5024, 1414870 |
| Widowed                                           | 149, 31389      | 80, 27635     | 70, 24647     | 684, 122382   | 126, 40937    | 206, 59874    |
| Divorced                                          | 695, 179067     | 543, 208182   | 649, 255809   | 1054, 239916  | 658, 241865   | 853, 287426   |
| Missing                                           | 2, 1347         | 2,664         | 0,0           | 3,502         | 2, 1431       | 0,0           |
| <b>Sex partners last 12m</b>                      |                 |               |               |               |               |               |
| 1                                                 | 4883, 1793871   | 6086, 2005936 | 6437, 2140357 | 5811, 1908525 | 6331, 1924121 | 6876,1924121  |
| 2-4                                               | 666, 242075     | 712, 236900   | 660, 254133   | 404, 123338   | 384, 118102   | 488,118102    |
| 5+                                                | 200, 76497      | 221, 74953    | 197, 78844    | 34, 10340     | 29, 8387      | 29,8387       |
| Missing                                           | 487, 106440     | 44,11896      | 681, 228796   | 1333, 110513  | 19, 6301      | 1053, 320588  |
| <b>Condom use last intercourse</b>                |                 |               |               |               |               |               |
| Not used                                          | 4946, 490230    | 5424, 1772851 | 6027, 1758067 | 6409, 350995  | 5567, 1688823 | 6710, 1997371 |
| Used                                              | 1270, 654750    | 1630, 553994  | 1934, 552103  | 764, 726368   | 1188, 365366  | 1603, 526907  |
| Missing                                           | 20, 6757        | 9, 2838       | 15, 4156      | 32, 9581      | 8, 2721       | 1209, 4850    |
| <b>Alcohol</b>                                    |                 |               |               |               |               |               |
| No use                                            | 504, 182855     | 557, 208127   | 802, 280558   | 1370, 404354  | 1082, 329781  | 1504, 461747  |
| Daily                                             | 1329, 415464    | 1185, 354083  | 1161, 348790  | 747, 195648   | 526, 146025   | 516, 142503   |
| Weekly                                            | 3301, 1, 235, 3 | 4002, 1310690 | 4589, 1571742 | 2905, 921169  | 3032, 926154  | 3924, 1215081 |
| Monthly                                           | 1097, 401590    | 1318, 456511  | 1421, 500330  | 2558, 767830  | 2122, 654757  | 2385, 500330  |
| Missing                                           | 5, 2653         | 1,273         | 2, 711        | 2, 504        | 1, 93         | 1,182         |
| <b>Tobacco</b>                                    |                 |               |               |               |               |               |

|                                          |               |               |               |               |               |               |
|------------------------------------------|---------------|---------------|---------------|---------------|---------------|---------------|
| Non-smoker                               | 4122, 1465671 | 4675, 1512349 | 5437, 1791473 | 5614, 1703513 | 4994, 1512349 | 6243, 1896416 |
| Casual smoker                            | 599, 216270   | 694, 233922   | 768, 285872   | 227, 145214   | 463, 233922   | 596, 193855   |
| Daily smoker                             | 1515, 555960  | 1693, 582120  | 1770, 624782  | 622, 440333   | 1306, 582120  | 1490, 465636  |
| Missing                                  | 0, 0          | 1, 1293       | 0,0           | 2, 444        | 0, 0          | 1,222         |
| <b>Cannabis<sup>b</sup></b>              |               |               |               |               |               |               |
| No use                                   | 4203, 1509223 | 4808, 1540934 | 5492, 1753661 | 5797, 1778908 | 5406, 1540934 | 6460, 1887252 |
| Any use                                  | 1612, 614244  | 1985, 702051  | 2453, 936771  | 1184, 384976  | 1133, 702051  | 1857, 638014  |
| Missing                                  | 421, 114433   | 270, 86968    | 30, 11698     | 588, 125620   | 224, 65444    | 13, 3863      |
| <b>Other illicit drugs<sup>b,c</sup></b> |               |               |               |               |               |               |
| No use                                   | 5520, 2020619 | 6663, 2185257 | 7400, 2459983 | 6821, 2113861 | 6549, 2185257 | 8026, 2416588 |
| Any use                                  | 313, 107355   | 393, 141195   | 562, 236133   | 173, 54604    | 212, 141195   | 300, 111683   |
| Missing                                  | 403, 109927   | 7, 3231       | 13, 6013      | 588,121040    | 2, 371        | 4, 858        |

a. Overall denominators for condom use and HIV testing differ because eligibility criteria for answering each question differed;

b. In 2007 questions about drugs were only asked to people between 15 to 69 years;

c. Combines use of ecstasy, cocaine, or heroin

Abbreviations: m, months; SFr, Swiss Francs; yrs, years

Table S11. Lifetime HIV testing and associations from univariable and multivariable logistic regression, by sociodemographic and behavioural characteristics, in men reporting only opposite-sex partners 2007, 2012 and 2017

| HIV Testing                        | Men 2007            |                                     | Men 2012            |                                     | Men 2017            |                                     | Adjusted OR (95% CI) <sup>a</sup> |
|------------------------------------|---------------------|-------------------------------------|---------------------|-------------------------------------|---------------------|-------------------------------------|-----------------------------------|
|                                    | Prevalence (95% CI) | Unadjusted OR <sup>a</sup> (95% CI) | Prevalence (95% CI) | Unadjusted OR <sup>a</sup> (95% CI) | Prevalence (95% CI) | Unadjusted OR <sup>a</sup> (95% CI) |                                   |
| <b>Age, years</b>                  |                     | p<0.001                             |                     | p<0.001                             |                     | p<0.001                             | p<0.001                           |
| Median (IQR) <sup>b</sup>          | 39 (31-49)          | 0.98 (0.98, 0.99)                   | 42 (32-50)          | 0.99(0.98,0.99)                     | 43 (31-47)          | 0.99(0.98,0.99)                     | 0.99 (0.98,0.99)                  |
| 16-24                              | 20 (17-24)          | ..                                  | 29 (25-33)          | ..                                  | 40 (37-44)          | ..                                  | ..                                |
| 25-34                              | 50 (46-54)          | ..                                  | 52 (48-56)          | ..                                  | 47 (43-50)          | ..                                  | ..                                |
| 35-44                              | 42 (39-45)          | ..                                  | 55 (52-58)          | ..                                  | 57 (54-60)          | ..                                  | ..                                |
| 45-54                              | 33 (30-36)          | ..                                  | 44 (41-47)          | ..                                  | 53 (50-56)          | ..                                  | ..                                |
| 55-64                              | 21 (18-24)          | ..                                  | 33 (29-35)          | ..                                  | 37 (34-40)          | ..                                  | ..                                |
| 65-74                              | 12 (9-14)           | ..                                  | 21 (18-25)          | ..                                  | 24 (21-27)          | ..                                  | ..                                |
| <b>Region</b>                      |                     | p<0.001                             |                     | p<0.001                             |                     | p<0.001                             | p<0.001                           |
| Lake Geneva                        | 43 (40-47)          | reference                           | 54 (51-57)          | reference                           | 55 (53-58)          | reference                           | reference                         |
| Midland                            | 28 (25-31)          | 0.51 (0.42, 0.62)                   | 37 (33-40)          | 0.50 (0.41, 0.60)                   | 42 (39-45)          | 0.59 (0.50, 0.69)                   | 0.54 (0.49, 0.62)                 |
| Northwest                          | 30 (26-35)          | 0.58 (0.46, 0.73)                   | 38 (34-41)          | 0.52 (0.42, 0.63)                   | 42 (38-45)          | 0.58 (0.48, 0.70)                   | 0.55 (0.48, 0.64)                 |
| Zurich                             | 34 (31-38)          | 0.69 (0.56, 0.85)                   | 48 (44-52)          | 0.79 (0.64, 0.98)                   | 48 (45-52)          | 0.76 (0.63, 0.91)                   | 0.66 (0.57, 0.76)                 |
| East                               | 23 (19-27)          | 0.39 (0.30, 0.50)                   | 35 (31-39)          | 0.46 (0.37, 0.58)                   | (39-36)             | 0.52 (0.44, 0.61)                   | 0.44 (0.38, 0.51)                 |
| Central                            | 31 (27-35)          | 0.59 (0.46, 0.75)                   | 35 (31-38)          | 0.45 (0.37, 0.56)                   | 39 (35-43)          | 0.51 (0.42, 0.62)                   | 0.50 (0.43, 0.57)                 |
| Ticino                             | 32 (27-37)          | 0.62 (0.47, 0.81)                   | 47 (42-53)          | 0.78 (0.61, 0.99)                   | 44 (39-49)          | 0.63 (0.51, 0.79)                   | 0.78 (0.66, 0.91)                 |
| <b>Highest educational level</b>   |                     | p<0.001                             |                     | p<0.001                             |                     | p<0.001                             | p<0.001                           |
| No school/primary                  | 21 (17-25)          | reference                           | 29 (25-33)          | reference                           | 32 (29-36)          | reference                           | reference                         |
| Secondary                          | 29 (27-31)          | 1.55 (1.20, 2.02)                   | 41 (38-43)          | 1.69 (1.35, 2.11)                   | 41 (39-43)          | 1.49 (1.25, 1.79)                   | 1.69 (1.45,1.97)                  |
| Tertiary                           | 40 (37-42)          | 2.46 (1.89, 3.21)                   | 47 (45-49)          | 2.18 (1.74, 2.72)                   | 52 (50-54)          | 2.34 (1.95, 2.80)                   | 2.43 (2.06,2.86)                  |
| <b>Income, SFr</b>                 |                     | p<0.001                             |                     | p<0.001                             |                     | p<0.001                             | p<0.001                           |
| No Income                          | 20 (13-29)          | 0.65 (0.39, 1.07)                   | 30 (22-38)          | 0.66 (0.45, 0.97)                   | 45 (39-51)          | 1.25 (0.96, 1.64)                   | 0.73 (0.60,0.93)                  |
| <4500                              | 28 (26-31)          | reference                           | 39 (36-42)          | reference                           | 40 (37-42)          | reference                           | reference                         |
| 4500-6000                          | 33 (30-36)          | 1.28 (1.07, 1.54)                   | 43 (40-46)          | 1.17 (0.98, 1.39)                   | 44 (42-47)          | 1.21 (1.05, 1.41)                   | 1.25 (1.12,1.39)                  |
| >6000                              | 37 (35-40)          | 1.52 (1.28, 1.79)                   | 46 (43-49)          | 1.33 (1.13, 1.55)                   | 52 (50-54)          | 1.66 (1.45, 1.89)                   | 1.55 (1.38,1.73)                  |
| <b>Marital Status</b>              |                     | p<0.001                             |                     | p<0.001                             |                     | p<0.001                             |                                   |
| Single                             | 38 (35-41)          | 1.70 (1.47, 1.98)                   | 46 (44-49)          | 1.5 (1.31, 1.72)                    | 49 (46-51)          | 1.43 (1.27, 1.61)                   | 1.18 (1.05,1.33)                  |
| Married                            | 26 (25-28)          | reference                           | 37 (35-38)          | reference                           | 40 (38-41)          | reference                           | reference                         |
| Widowed                            | 19 (11-30)          | 0.65 (0.34, 1.22)                   | 41 (27-55)          | 1.17 (0.66, 2.08)                   | 43 (29-58)          | 1.17 (0.65, 2.10)                   | 1.50 (0.96,2.34)                  |
| Divorced                           | 51 (46-56)          | 2.91 (2.33, 3.64)                   | 56 (50-61)          | 2.27 (1.76, 2.92)                   | 61 (57-66)          | 2.41 (1.97, 2.94)                   | 2.46(2.10,2.88)                   |
| <b>Age first intercourse, yrs</b>  |                     | p<0.001                             |                     | p<0.001                             |                     | p<0.001                             | p<0.001                           |
| Median age (IQR) <sup>b</sup>      | 18 (17-19)          | 0.90 (0.88, 0.93)                   | 18 (17-19)          | 0.91 (0.89, 0.93)                   | 17 (16-18)          | 0.97 (0.96, 0.98)                   | 0.95 (0.94,0.97)                  |
| <b>Sex partners last 12m</b>       |                     | p<0.001                             |                     | p<0.001                             |                     | p<0.001                             | p=0.014                           |
| 1                                  | 30 (29-32)          | reference                           | 41 (39-42)          | reference                           | 45 (43-46)          | reference                           | reference                         |
| 2-4                                | 42 (37-47)          | 1.64 (1.32, 2.05)                   | 46 (41-51)          | 1.24 (1.00, 1.55)                   | 54 (49-59)          | 1.46 (1.20, 1.77)                   | 1.16 (1.00,1.35)                  |
| 5+                                 | 48 (39-58)          | 2.13 (1.45, 3.13)                   | 54 (45-62)          | 1.67 (1.16, 2.41)                   | 57 (48-65)          | 1.63 (1.16, 2.30)                   | 1.37 (1.06,1.75)                  |
| <b>Condom use last intercourse</b> |                     | p=0.6                               |                     | p=0.8                               |                     | p=0.3                               | p<0.001                           |

|                                          |               |                   |            |                   |            |                   |                  |
|------------------------------------------|---------------|-------------------|------------|-------------------|------------|-------------------|------------------|
| Not used                                 | 32<br>(30-36) | reference         | 41 (38-45) | reference         | 46 (44-49) | reference         | reference        |
| Used                                     | 33 (30-36)    | 1.05 (0.89, 1.24) | 42 (40-44) | 0.98 (0.84, 1.14) | 45 (43-46) | 1.07 (0.94, 1.21) | 0.82 (0.73,0.92) |
| <b>Alcohol</b>                           |               | p=0.13            |            | p=0.8             |            | p<0.001           | p=0.07           |
| No use                                   | 29 (24-35)    | reference         | 41 (36-47) | reference         | 41 (37-45) | reference         | reference        |
| Daily                                    | 30 (27-33)    | 1.01 (0.75, 1.35) | 40 (37-44) | 0.96 (0.73, 1.25) | 38 (35-41) | 0.88 (0.71, 1.10) | 0.80 (0.67,0.96) |
| Weekly                                   | 33 (32-35)    | 1.21 (0.92, 1.57) | 42 (40-44) | 1.02 (0.80, 1.29) | 47 (45-49) | 1.27 (1.06, 1.53) | 0.82 (0.70,0.94) |
| Monthly                                  | 31 (27-34)    | 1.07 (0.79, 1.43) | 43 (39-47) | 1.06 (0.81, 1.39) | 46 (43-49) | 1.24 (1.01, 1.53) | 0.94 (0.80,1.12) |
| <b>Tobacco</b>                           |               | p<0.001           |            | p<0.001           |            | p=0.03            | p=0.5            |
| Non-smoker                               | 28 (27-30)    | reference         | 39 (37-40) | reference         | 43 (42-45) | reference         | reference        |
| Casual smoker                            | 38 (33-42)    | 1.52 (1.22, 1.89) | 45 (40-50) | 1.28 (1.03, 1.59) | 50 (46-54) | 1.29 (1.08, 1.56) | 0.99 (0.86,1.14) |
| Daily smoker                             | 39 (36-42)    | 1.61 (1.38, 1.88) | 47 (43-50) | 1.38 (1.19, 1.59) | 48 (45-50) | 1.18 (1.04, 1.34) | 1.07 (0.97,1.18) |
| <b>Cannabis<sup>c</sup></b>              |               | p<0.001           |            | p<0.001           |            | p<0.001           | p<0.001          |
| No use                                   | 27 (25-29)    | reference         | 35 (33-37) | reference         | 38 (37-40) | reference         | reference        |
| Any use                                  | 48 (44-51)    | 2.46 (2.12, 2.86) | 56 (53-59) | 2.36 (2.06, 2.71) | 58 (55-60) | 2.22 (1.98, 2.50) | 1.62 (1.46,1.78) |
| <b>Other illicit drugs<sup>c,d</sup></b> |               | p<0.001           |            | p<0.001           |            | p<0.001           | p<0.001          |
| No use                                   | 36 (35-37)    | reference         | 40 (39-42) | reference         | 43 (42-44) | reference         | reference        |
| Any use                                  | 79 (71-85)    | 4.62 (3.41, 6.27) | 65 (59-71) | 2.78 (2.09, 3.69) | 66 (61-71) | 2.60 (2.10, 3.23) | 1.72 (1.43,2.06) |

- p value from Wald test;
- Median age of the proportion tested for HIV;
- In 2007 questions about drugs were only asked to people between 15 to 69 years;
- Combines use of ecstasy, cocaine, or heroin and combines categories of use more than 12 months ago and use within last 12 months.

Abbreviations: CI, confidence interval; m, months; OR, odds ratio; SFr, Swiss Francs; yrs, years;

Table S12. Prevalence of lifetime HIV testing and associations from univariable and multivariable logistic regression, by sociodemographic and behavioural characteristics, in women reporting only opposite-sex partners 2007, 2012 and 2017

| HIV Testing                               | Women 2007          |                                     | Women 2012          |                                     | Women 2017          |                                     | Adjusted OR (95% CI) <sup>a</sup> |
|-------------------------------------------|---------------------|-------------------------------------|---------------------|-------------------------------------|---------------------|-------------------------------------|-----------------------------------|
|                                           | Prevalence (95% CI) | Unadjusted OR <sup>a</sup> (95% CI) | Prevalence (95% CI) | Unadjusted OR <sup>a</sup> (95% CI) | Prevalence (95% CI) | Unadjusted OR <sup>a</sup> (95% CI) |                                   |
| <b>Age, years</b>                         |                     | p<0.001                             |                     | p<0.001                             |                     | p<0.001                             | p<0.001                           |
| Median (IQR) <sup>b</sup>                 | 38 (30-45)          | 0.96 (0.95, 0.96)                   | 40 (31-47)          | 0.97 (0.97, 0.97)                   | 43 (32-53)          | 0.98 (0.97, 0.98)                   | 0.97 (0.96, 0.97)                 |
| 16-24                                     | 33 (28-38)          | ..                                  | 34 (30-38)          | ..                                  | 35 (32-39)          | ..                                  |                                   |
| 25-34                                     | 56 (52-59)          | ..                                  | 63 (60-67)          | ..                                  | 62 (59-65)          | ..                                  |                                   |
| 35-44                                     | 55 (52-58)          | ..                                  | 63 (60-66)          | ..                                  | 70 (68-73)          | ..                                  |                                   |
| 45-54                                     | 32 (29-35)          | ..                                  | 49 (46-52)          | ..                                  | 58 (55-60)          | ..                                  |                                   |
| 55-64                                     | 15 (12-17)          | ..                                  | 22 (19-25)          | ..                                  | 38 (35-41)          | ..                                  |                                   |
| 65-74                                     | 6 (5-8)             | ..                                  | 11 (08-15)          | ..                                  | 22 (19-25)          | ..                                  |                                   |
| <b>Region</b>                             |                     | p<0.001                             |                     | p<0.001                             |                     | p<0.001                             | p<0.001                           |
| Lake Geneva                               | 47 (43-50)          | reference                           | 59 (56-62)          | reference                           | 64 (62-67)          | reference                           | reference                         |
| Midland                                   | 36 (34-39)          | 0.65 (0.55, 0.78)                   | 44 (41-47)          | 0.55 (0.46, 0.66)                   | 49 (47-52)          | 0.54 (0.46, 0.63)                   | 0.58 (0.51, 0.65)                 |
| Northwest                                 | 31 (27-35)          | 0.51 (0.42, 0.64)                   | 42 (38-45)          | 0.5 (0.41, 0.61)                    | 51 (47-54)          | 0.58 (0.48, 0.69)                   | 0.51 (0.44, 0.58)                 |
| Zurich                                    | 38 (35-42)          | 0.71 (0.58, 0.86)                   | 48 (43-52)          | 0.63 (0.51, 0.78)                   | 54 (51-58)          | 0.67 (0.56, 0.80)                   | 0.56 (0.49, 0.64)                 |
| East                                      | 26 (22-30)          | 0.4 (0.32, 0.51)                    | 41 (36-45)          | 0.47 (0.38, 0.59)                   | 42 (39-45)          | 0.41 (0.34, 0.48)                   | 0.42 (0.36, 0.48)                 |
| Central                                   | 28 (25-32)          | 0.45 (0.37, 0.56)                   | 39 (35-42)          | 0.44 (0.36, 0.53)                   | 40 (36-44)          | 0.37 (0.30, 0.45)                   | 0.42 (0.36, 0.48)                 |
| Ticino                                    | 33 (29-38)          | 0.58 (0.46, 0.73)                   | 47 (42-52)          | 0.63 (0.49, 0.79)                   | 51 (46-55)          | 0.58 (0.47, 0.71)                   | 0.62 (0.53, 0.73)                 |
| <b>Highest educational level</b>          |                     | p<0.001                             |                     | p<0.001                             |                     | p<0.001                             | p<0.001                           |
| No school/primary                         | 19 (17-23)          | reference                           | 27 (24-31)          | reference                           | 35 (32-39)          | reference                           | reference                         |
| Secondary                                 | 35 (33-36)          | 2.18 (1.78, 2.67)                   | 44 (42-46)          | 2.09 (1.69, 2.58)                   | 47 (45-49)          | 1.63 (1.37, 1.93)                   | 2.08 (1.81, 2.38)                 |
| Tertiary                                  | 52 (49-56)          | 4.52 (3.59, 5.70)                   | 60 (58-63)          | 4.05 (3.21, 5.11)                   | 64 (62-66)          | 3.31 (2.76, 3.96)                   | 3.35 (2.87, 3.92)                 |
| <b>Income, SFr</b>                        |                     | p<0.001                             |                     | p<0.001                             |                     | p<0.001                             | p<0.001                           |
| No Income                                 | 31 (28-35)          | 0.87 (0.72, 1.04)                   | 43 (39-47)          | 0.91 (0.76, 1.09)                   | 43 (39-47)          | 0.96 (0.81, 1.13)                   | 0.91 (0.81, 1.02)                 |
| <4500                                     | 34 (33-36)          | reference                           | 45 (43-47)          | reference                           | 45 (43-47)          | reference                           | reference                         |
| 4500-6000                                 | 49 (45-53)          | 1.82 (1.51, 2.19)                   | 57 (53-62)          | 1.65 (1.34, 2.03)                   | 57 (53-62)          | 1.88 (1.60, 2.21)                   | 1.42 (1.25, 1.62)                 |
| >6000                                     | 56 (49-62)          | 2.39 (1.84, 3.10)                   | 61 (55-66)          | 1.89 (1.47, 2.43)                   | 61 (55-66)          | 2.34 (1.93, 2.85)                   | 1.64 (1.39, 1.94)                 |
| <b>Marital Status</b>                     |                     | p<0.001                             |                     | p<0.001                             |                     | p<0.001                             | p<0.001                           |
| Single                                    | 45 (42-48)          | 1.82 (1.58, 2.11)                   | 51 (48-54)          | 1.5 (1.31, 1.73)                    | 58 (55-60)          | 1.65 (1.46, 1.86)                   | 0.68 (0.60, 0.76)                 |
| Married                                   | 31 (29-33)          | reference                           | 41 (39-43)          | reference                           | 45 (44-47)          | reference                           | reference                         |
| Widowed                                   | 16 (12-21)          | 0.43 (0.31, 0.60)                   | 35 (24-46)          | 0.76 (0.46, 1.24)                   | 33 (26-40)          | 0.58 (0.41, 0.81)                   | 1.13 (0.83, 1.55)                 |
| Divorced                                  | 47 (43-51)          | 1.98 (1.66, 2.38)                   | 64 (59-69)          | 2.51 (1.99, 3.15)                   | 66 (62-70)          | 2.33 (1.96, 2.78)                   | 2.33 (2.01, 2.69)                 |
| <b>Age first intercourse, yrs</b>         |                     | p<0.001                             |                     | p<0.001                             |                     | p<0.001                             | p<0.001                           |
| Median age (IQR) <sup>b</sup>             | 18 (17-19)          | 0.88 (0.86, 0.90)                   | 17 (16-19)          | 0.88 (0.85, 0.90)                   | 17 (16-19)          | 0.95 (0.93, 0.98)                   | 0.96 (0.94, 0.98)                 |
| <b>Sex partners last 12m</b>              |                     | p<0.001                             |                     | p<0.001                             |                     | p<0.001                             | p=0.8                             |
| 1                                         | 37 (35-38)          | reference                           | 46 (44-47)          | reference                           | 52 (50-53)          | reference                           | reference                         |
| 2-4                                       | 50 (43-56)          | 1.69 (1.31, 2.19)                   | 57 (50-63)          | 1.56 (1.20, 2.02)                   | 69 (63-74)          | 2.06 (1.60, 2.67)                   | 1.06 (0.89, 1.27)                 |
| 5+                                        | 40 (21-62)          | 1.18 (0.51, 2.72)                   | 64 (38-85)          | 2.12 (0.81, 5.54)                   | 74 (51-91)          | 2.71 (1.01, 7.30)                   | 0.91 (0.51, 1.63)                 |
| <b>Condom use last intercourse</b>        |                     | p=0.3                               |                     | p= 0.8                              |                     | p= 0.051                            |                                   |
| Not used                                  | 34 (33-36)          | reference                           | 47 (43-50)          | reference                           | 54 (51-57)          | reference                           | reference                         |
| Used                                      | 42 (39-46)          | 1.41 (1.20, 1.65)                   | 46 (45-48)          | 1.02 (0.87, 1.20)                   | 51 (49-52)          | 1.14 (1.00, 1.29)                   | 0.79 (0.71, 0.89)                 |
| <b>Alcohol</b>                            |                     | p<0.001                             |                     | p<0.001                             |                     | p<0.001                             | p=0.03                            |
| No use                                    | 66 (63-69)          | reference                           | 47 (43-50)          | reference                           | 47 (44-50)          | reference                           | reference                         |
| Daily                                     | 76 (72-80)          | 0.62 (0.48, 0.80)                   | 40 (34-45)          | 0.75 (0.58, 0.98)                   | 39 (34-44)          | 0.72 (0.57, 0.92)                   | 0.76 (0.63, 0.92)                 |
| Weekly                                    | 61 (58-63)          | 1.27 (1.07, 1.50)                   | 48 (46-50)          | 1.05 (0.88, 1.25)                   | 55 (53-57)          | 1.41 (1.23, 1.63)                   | 0.91 (0.81, 1.03)                 |
| Monthly                                   | 66 (63-68)          | 1.03 (0.86, 1.22)                   | 45 (43-48)          | 0.95 (0.79, 1.14)                   | 50 (48-53)          | 1.16 (1.00, 1.36)                   | 0.92 (0.82, 1.04)                 |
| <b>Tobacco</b>                            |                     | p<0.001                             |                     | p<0.001                             |                     | p<0.001                             | p=0.01                            |
| Non-smoker                                | 33 (32-35)          | reference                           | 44 (42-45)          | reference                           | 49 (47-50)          | reference                           | reference                         |
| Casual smoker                             | 39 (34-45)          | 1.30 (1.01, 1.66)                   | 56 (50-61)          | 1.65 (1.30, 2.08)                   | 58 (53-62)          | 1.42 (1.17, 1.73)                   | 0.95 (0.80, 1.11)                 |
| Daily smoker                              | 42 (39-46)          | 1.48 (1.27, 1.71)                   | 53 (50-56)          | 1.46 (1.25, 1.71)                   | 59 (56-62)          | 1.49 (1.31, 1.71)                   | 1.16 (1.04, 1.29)                 |
| <b>Cannabis<sup>c</sup></b>               |                     | p<0.001                             |                     | p<0.001                             |                     | p<0.001                             | p<0.001                           |
| No use                                    | 32 (30-33)          | reference                           | 41 (39-43)          | reference                           | 45 (44-46)          | reference                           | reference                         |
| Any use                                   | 61 (58-65)          | 3.34 (2.84, 3.93)                   | 67 (63-70)          | 2.93 (2.47, 3.47)                   | 70 (68-73)          | 5.33 (3.48, 8.14)                   | 1.84 (1.64, 2.06)                 |
| <b>Other illicit drugs<sup>c, d</sup></b> |                     | p<0.001                             |                     | p<0.001                             |                     | p<0.001                             | p<0.001                           |
| No use                                    | 36 (35-37)          | reference                           | 45 (44-47)          | reference                           | 50 (49-51)          |                                     | reference                         |
| Any use                                   | 79 (71-85)          | 6.55 (4.33, 9.91)                   | 81 (74-87)          | 2.87 (2.52, 3.27)                   | 83 (78-88)          | 5.02 (3.54, 7.14)                   | 2.98 (2.20, 4.02)                 |

e. p value from Wald test;

- f. Median age of the proportion tested for HIV;
- g. In 2007 questions about drugs were only asked to people between 15 to 69 years;
- h. Combines use of ecstasy, cocaine, or heroin and combines categories of use more than 12 months ago and use within last 12 months.

Abbreviations: CI, confidence interval; m, months; OR, odds ratio; SFr, Swiss Francs; yrs, years;

*Table S13. HIV testing in the last 12 months, men and women reporting only opposite-sex partners and men reporting any same-sex partner 2012, 2017.*

| HIV testing in the last 12 months | Men reporting only opposite-sex partners |                               | Women reporting only opposite-sex partners |                               | Men reporting any same-sex partner |                               |
|-----------------------------------|------------------------------------------|-------------------------------|--------------------------------------------|-------------------------------|------------------------------------|-------------------------------|
|                                   | 2012<br>Prevalence % (95% CI)            | 2017<br>Prevalence % (95% CI) | 2012<br>Prevalence % (95% CI)              | 2017<br>Prevalence % (95% CI) | 2012<br>Prevalence % (95% CI)      | 2017<br>Prevalence % (95% CI) |
| Total                             | 7 (6-8)                                  | 7 (7-8)                       | 9 (8-10)                                   | 8 (7-9)                       | 30 (14-38)                         | 39 (30-47)                    |
| <b>Age, years</b>                 |                                          |                               |                                            |                               |                                    |                               |
| 16-24                             | 14 (11-18)                               | 18 (15-21)                    | 16 (13-19)                                 | 16 (13-19)                    | 35 (11-70)                         | 35 (17-59)                    |
| 25-34                             | 10 (8-13)                                | 10 (8-12)                     | 18 (15-20)                                 | 16 (13-18)                    | 41 (23-62)                         | 60 (39-79)                    |
| 35-44                             | 7 (6-9)                                  | 8 (6-10)                      | 10 (8-12)                                  | 9 (7-11)                      | 32 (19-48)                         | 35 (19-55)                    |
| 45-54                             | 6 (5-8)                                  | 5 (4-6)                       | 4 (3-5)                                    | 4 (3-5)                       | 27 (14-45)                         | 44 (26-63)                    |
| 55-64                             | 3 (2-4)                                  | 4 (3-5)                       | 2 (1-4)                                    | 3 (2-4)                       | 26 (11-50)                         | 19 (9-37)                     |
| 65-74                             | 4 (2-5)                                  | 2 (1-3)                       | 1 (0-3)                                    | 1 (1-2)                       | 12 (2-49)                          | -                             |
| <b>Number of partners</b>         |                                          |                               |                                            |                               |                                    |                               |
| 1                                 | 5 (5-6)                                  | 5 (5-6)                       | 8 (7-8)                                    | 7 (6-8)                       | 20 (12-30)                         | 31 (21-44)                    |
| 2-4                               | 17 (13-21)                               | 18 (15-22)                    | 28 (23-34)                                 | 31 (26-37)                    | 42 (22-63)                         | 48 (29-67)                    |
| 5+                                | 30 (21-40)                               | 28 (21-36)                    | 41 (20-65)                                 | 33 (16-56)                    | 61 (37-82)                         | 50 (31-69)                    |

Table S14. Lifetime HIV testing, men and women with any same-sex partners. Denominators, unweighted and weighted, and number of missing values for each survey and variable

| HIV Testing                                       | Men<br>2007 | Men<br>2012 | Men<br>2017 | Women<br>2007 | Women<br>2012 | Women<br>2017 |
|---------------------------------------------------|-------------|-------------|-------------|---------------|---------------|---------------|
| <b>Totals, N unweighted, weighted<sup>a</sup></b> | 187, 64684  | 237, 81464  | 178,74070   | 216, 67259    | 289, 92734    | 172, 69018    |
| <b>Age, years</b>                                 |             |             |             |               |               |               |
| 16-24                                             | 7, 3497     | 20, 5643    | 25, 8197    | 20, 10605     | 54, 15237     | 14084, 8197   |
| 25-34                                             | 43, 17370   | 33, 14174   | 32, 17291   | 48, 17530     | 79, 30848     | 25382, 17291  |
| 35-44                                             | 58, 19554   | 68, 27822   | 38, 18051   | 64, 15196     | 62, 19610     | 12090, 18051  |
| 45-54                                             | 36, 11628   | 59, 18085   | 36, 14631   | 56, 18019     | 61, 17425     | 12713, 14631  |
| 55-64                                             | 31, 9701    | 38, 11063   | 37, 13623   | 22, 4563      | 23, 6537      | 3117, 13623   |
| 65-74                                             | 12, 2935    | 19, 4678    | 10, 2277    | 6, 1344       | 10, 3077      | 1631, 2277    |
| <b>Region</b>                                     |             |             |             |               |               |               |
| Lake Geneva                                       | 29, 10,828  | 43, 14665   | 44, 18486   | 53, 13946     | 61, 19001     | 43, 16336     |
| Midland                                           | 52, 17386   | 35, 15606   | 17, 8466    | 45, 11739     | 52, 17968     | 38, 18342     |
| Northwest                                         | 17, 6329    | 43, 10864   | 19, 10322   | 34, 12394     | 56, 17660     | 16, 6521      |
| Zurich                                            | 45, 18480   | 49, 24087   | 37, 19055   | 44, 17850     | 40, 21183     | 26, 14769     |
| East                                              | 18, 5623    | 27, 9230    | 27, 10121   | 17, 5344      | 29, 7467      | 20, 6475      |
| Central                                           | 14, 3722    | 34, 5939    | 26, 5903    | 19, 5549      | 36, 6356      | 20, 4442      |
| Ticino                                            | 12, 2317    | 6, 1073     | 8, 1718     | 4, 437        | 15, 3100      | 9, 2133       |
| <b>Highest educational level</b>                  |             |             |             |               |               |               |
| No school/ primary                                | 8, 3259     | 19, 4915    | 15, 4467    | 10, 2791      | 27, 8459      | 17, 5036      |
| Secondary                                         | 98, 30528   | 106, 37877  | 80, 31484   | 131, 43428    | 152, 51662    | 83, 33636     |
| Tertiary                                          | 81, 30897   | 112, 38672  | 83, 38119   | 75, 21040     | 110, 32612    | 72, 30346     |
| Missing                                           | 0, 0        | 0, 0        | 0, 0        | 0, 0          | 0, 0          | 0, 0          |
| <b>Income, SFr</b>                                |             |             |             |               |               |               |
| No Income                                         | 5, 2205     | 9, 2488     | 12, 3984    | 14, 5575      | 19, 6716      | 8, 2581       |
| <4500                                             | 66, 24662   | 64, 20121   | 62, 26067   | 121, 38545    | 178, 57005    | 106, 44156    |
| 4500-6000                                         | 51, 16664   | 49, 16453   | 42, 17768   | 42, 12900     | 37, 11380     | 31, 10373     |
| >6000                                             | 51, 17320   | 732, 31517  | 50, 20141   | 24, 5869      | 29, 9141      | 22, 9965      |
| Missing                                           | 14, 3833    | 32, 10885   | 12, 6110    | 15, 4370      | 26, 8492      | 5, 1943       |
| <b>Marital status</b>                             |             |             |             |               |               |               |
| Single                                            | 119, 41500  | 118, 45409  | 120, 52194  | 117, 35396    | 147, 48911    | 111, 47453    |
| Married                                           | 41, 14123   | 96, 26288   | 18, 5042    | 47, 18229     | 99, 27702     | 22, 7883      |
| Widowed                                           | 0, 0        | 1, 178      | 0, 0        | 4, 839        | 5, 1679       | 2, 428        |
| Divorced                                          | 26, 7948    | 22, 9589    | 13, 5267    | 48, 12795     | 37, 13873     | 14, 5518      |
| Missing                                           | 1, 1113     | 0, 0        | 27, 11566   | 0, 0          | 1, 569        | 23, 7735      |
| <b>Sex partners last 12m</b>                      |             |             |             |               |               |               |
| 1                                                 | 78, 28188   | 158,51901   | 86,34681    | 136, 45498    | 3367, 75583   | 106, 44848    |
| 2-4                                               | 62, 21451   | 44,17482    | 40,19451    | 36, 10840     | 253, 13385    | 41, 16743     |
| 5+                                                | 26, 10147   | 30,10335    | 37,14688    | 12, 3257      | 23, 3767      | 7, 3005       |
| Missing                                           | 8, 4889     | 5, 1747     | 15, 5250    | 32, 7664      | 0, 0          | 18, 4422      |
| <b>Condom use last intercourse</b>                |             |             |             |               |               |               |
| Used                                              | 80, 26642   | 150,53233   | 91,34347    | 51, 14040     | 213, 66891    | 129, 51731    |
| Not used                                          | 107, 38042  | 86,27692    | 87,39903    | 165, 53219    | 76, 25843     | 43, 17287     |
| Missing                                           | 0,0         | 1, 539      | 0, 0        | 0,0           | 0, 0          | 0, 0          |
| <b>Alcohol</b>                                    |             |             |             |               |               |               |
| No use                                            | 17, 4041    | 28, 8021    | 12, 4354    | 20, 7383      | 32, 10546     | 225, 72098    |
| Daily                                             | 37, 14060   | 36, 12419   | 28, 9542    | 23, 6067      | 24, 7291      | 64, 20636     |
| Weekly                                            | 96, 31944   | 132, 46296  | 99, 44739   | 114, 35551    | 155, 48066    | 225, 72098    |
| Monthly                                           | 37, 14638   | 41, 14729   | 39, 15436   | 58, 18006     | 78, 26831     | 64, 20636     |
| Missing                                           | 0, 0        | 0, 0        | 0, 0        | 1,            | 0, 0          | 0, 0          |
| <b>Tobacco</b>                                    |             |             |             |               |               |               |
| Non-smoker                                        | 102, 37373  | 137, 46754  | 103, 43499  | 102,37373     | 139, 47724    | 84, 34367     |



|                                           |             |            |            |           |             |            |
|-------------------------------------------|-------------|------------|------------|-----------|-------------|------------|
| Casual smoker                             | 25, 7274    | 30, 11727  | 18, 5952   | 25,7274   | 50, 16277   | 19, 7859   |
| Daily smoker                              | 60, 20037   | 70, 22983  | 57, 24620  | 60,20037  | 100, 28733  | 69, 26792  |
| Missing                                   | 0, 0        | 0, 0       | 0, 0       | 0, 0      | 0, 0        | 0, 0       |
| <b>Cannabis<sup>b</sup></b>               |             |            |            |           |             |            |
| No use                                    | 90, 26874   | 125, 40575 | 91, 37982  | 91, 27166 | 86, 28336   | 74, 28862  |
| Any use                                   | 90, 35547   | 110, 39979 | 85, 34967  | 89, 27750 | 203, 64398  | 96, 39422  |
| Missing                                   | 7, 2264     | 2, 910     | 2, 1121    | 3, 1547   | 0, 0        | 2,734      |
| <b>Other illicit drugs<sup>b, c</sup></b> |             |            |            |           |             |            |
| No use                                    | 138, 46,062 | 178, 57781 | 144, 60100 | 138,52314 | 225, 72,098 | 136, 53648 |
| Any use                                   | 43, 16,637  | 54, 22233  | 34, 13970  | 43,14945  | 64, 20,636  | 36, 15370  |
| Missing                                   | 6, 19860    | 5, 1543    | 0, 0       | 0, 0      | 0, 0        | 0, 0       |

a. Overall denominators for condom use and HIV testing differ because eligibility criteria for answering each question differed;

b. In 2007 questions about drugs were only asked to people between 15 to 69 years;

c. Combines use of ecstasy, cocaine, or heroin

Abbreviations: m, months; SFr, Swiss Francs; yrs, years

Table S15. Lifetime HIV testing and associations from univariable and multivariable logistic regression, testing, by sociodemographic and behavioural characteristics in men reporting any male sex partner, 2007, 2012, 2017

| HIV testing                                | 2007                |                                     | 2012                |                                     | 2017                |                                     | Adjusted OR (95% CI) <sup>a</sup> |
|--------------------------------------------|---------------------|-------------------------------------|---------------------|-------------------------------------|---------------------|-------------------------------------|-----------------------------------|
|                                            | Prevalence (95% CI) | Unadjusted OR (95% CI) <sup>a</sup> | Prevalence (95% CI) | Unadjusted OR (95% CI) <sup>a</sup> | Prevalence (95% CI) | Unadjusted OR (95% CI) <sup>a</sup> |                                   |
| <b>Age</b>                                 |                     | p=0.072                             |                     | p=0.3                               |                     | p=0.9                               | p=0.5                             |
| Median (IQR) <sup>b</sup>                  | 38 (30-48)          | 0.97 (0.94, 1.00)                   | 42 (35-49)          | 0.98 (0.93, 1.02)                   | 39 (32-52)          | 1.00 (0.97, 1.04)                   | 0.99 (0.97, 1.02)                 |
| 16-24                                      | 67 (00-100)         | ..                                  | 43 (14-77)          | ..                                  | 62 (38-82)          | ..                                  | ..                                |
| 25-34                                      | 82 (64-92)          | ..                                  | 92 (76-97)          | ..                                  | 92 (69-98)          | ..                                  | ..                                |
| 35-44                                      | 77 (61-88)          | ..                                  | 88 (72-95)          | ..                                  | 81 (62-92)          | ..                                  | ..                                |
| 45-54                                      | 64 (38-83)          | ..                                  | 89 (78-95)          | ..                                  | 96 (85-99)          | ..                                  | ..                                |
| 55-64                                      | 61 (36-81)          | ..                                  | 72 (53-86)          | ..                                  | 81 (61-92)          | ..                                  | ..                                |
| 65-74                                      | 66 (30-90)          | ..                                  | 34 (14-63)          | ..                                  | 42 (08-87)          | ..                                  | ..                                |
| <b>Region</b>                              |                     | p=0.2                               |                     | p=0.049                             |                     | p<0.001                             |                                   |
| Lake Geneva                                | 75 (54-89)          | reference                           | 83 (68-92)          | reference                           | 83 (68-92)          | reference                           | ..                                |
| Midland                                    | 68 (49-83)          | 0.71 (0.21, 2.37)                   | 82 (65-92)          | 0.91 (0.28, 3.03)                   | 82 (65-92)          | 0.66 (0.12, 3.78)                   | ..                                |
| Northwest                                  | 84 (58-97)          | 1.81 (0.35, 9.48)                   | 70 (44-87)          | 0.46 (0.12, 1.75)                   | 70 (44-87)          | 0.47 (0.11, 1.91)                   | ..                                |
| Zurich                                     | 77 (59-90)          | 1.16 (0.33, 4.11)                   | 94 (83-98)          | 2.93 (0.75, 11.5)                   | 94 (83-98)          | 1.82 (0.47, 7.07)                   | ..                                |
| East                                       | 41 (15-70)          | 0.24 (0.05, 1.03)                   | 60 (35-81)          | 0.3 (0.08, 1.07)                    | 60 (35-81)          | 0.57 (0.15, 2.15)                   | ..                                |
| Central                                    | 84 (46-99)          | 1.8 (0.23, 14.2)                    | 70 (46-86)          | 0.46 (0.13, 1.62)                   | 70 (46-86)          | 0.39 (0.11, 1.41)                   | ..                                |
| Ticino                                     | 88 (59-99)          | 2.42 (0.37, 15.7)                   | 67 (18-95)          | 0.40 (0.06, 2.83)                   | 100                 | -                                   | ..                                |
| <b>Education level</b>                     |                     | p=0.8                               |                     | p=0.01                              |                     | p=0.10                              |                                   |
| No school/primary                          | 73 (00-100)         | reference                           | 44 (19-73)          | reference                           | 83 (52-96)          | reference                           | ..                                |
| Secondary                                  | 70 (57-80)          | 0.86 (0.12, 6.06)                   | 79 (67-87)          | 0.63 (0.16, 2.41)                   | 75 (63-85)          | 0.63 (0.16, 2.41)                   | ..                                |
| Tertiary                                   | 75 (61-85)          | 1.11 (0.16, 7.73)                   | 87 (79-92)          | 1.84 (0.43, 7.89)                   | 90 (80-95)          | 1.84 (0.43, 7.89)                   | ..                                |
| <b>Income, SFr</b>                         |                     | p=0.6                               |                     | p=0.14                              |                     | p=0.011                             |                                   |
| No Income                                  | 54 (0-100)          | 0.69 (0.08, 6.37)                   | 76 (0-100)          | 1.15 (0.22, 5.94)                   | 66 (26-92)          | 0.66 (0.16, 2.64)                   | ..                                |
| <4500                                      | 57 (42-72)          | reference                           | 74 (58-85)          | reference                           | 75 (60-86)          | reference                           | ..                                |
| 4500-6000                                  | 40 (25-58)          | 0.79 (0.28, 2.25)                   | 89 (79-95)          | 2.91 (1.02, 8.31)                   | 92 (81-97)          | 3.85 (1.20, 12.4)                   | ..                                |
| >6000                                      | 41 (26-58)          | 0.50 (0.18, 1.40)                   | 87 (78-93)          | 2.48 (0.95, 6.47)                   | 93 (82-97)          | 4.2 (1.29, 13.7)                    | ..                                |
| <b>Marital Status</b>                      |                     | p=0.001                             |                     | p<0.001                             |                     | p=0.8                               |                                   |
| Single                                     | 80 (70-88)          | 4.51 (1.84, 11.1)                   | 86 (78-92)          | 2.15 (0.96, 4.81)                   | 81 (72-88)          | 0.95 (0.26, 3.42)                   | ..                                |
| Married                                    | 47 (30-65)          | reference                           | 75 (64-83)          | reference                           | 82 (53-95)          | reference                           | ..                                |
| Widowed                                    | -                   | -                                   | 100                 | -                                   | -                   | -                                   | ..                                |
| Divorced                                   | 87 (65-96)          | 7.34 (1.88, 28.7)                   | 68 (33-90)          | 0.83 (0.19, 3.61)                   | 88 (57-98)          | 1.58 (0.26, 9.49)                   | ..                                |
| <b>Age first sexual intercourse, years</b> |                     | p= 0.038                            |                     | p= 0.9                              |                     | p= 0.5                              |                                   |
| Median (IQR)                               | 17 (15-19)          | 0.87 (0.76, 0.99)                   | 17 (16-18)          | 0.99 (0.88, 1.11)                   | 17 (16-18)          | 0.97 (0.89, 1.06)                   | ..                                |
| <b>Sex partners 12m</b>                    |                     | p<0.001                             |                     | p=0.6                               |                     | p=0.3                               | p=0.6                             |
| 1                                          | 68 (53-79)          | reference                           | 77 (68-84)          | reference                           | 82 (70-89)          | reference                           | Reference                         |
| 2-4                                        | 73 (57-84)          | 1.26 (0.50, 3.18)                   | 83 (66-92)          | 1.40 (0.53, 3.70)                   | 91 (80-96)          | 2.29 (0.75, 6.96)                   | 1.14 (0.61, 2.13)                 |
| 5+                                         | 98 (91-100)         | 27.1 (4.99, 147)                    | 89 (56-98)          | 2.43 (0.38, 15.7)                   | 81 (59-93)          | 0.98 (0.29, 3.39)                   | 1.65 (0.63, 4.30)                 |
| <b>Condom use last intercourse</b>         |                     | p=0.072                             |                     | p=0.2                               |                     | p=0.8                               |                                   |
| Not used                                   | 69 (56-80)          | reference                           | 77 (68-84)          | reference                           | 84 (74-91)          | reference                           | ..                                |
| Used                                       | 83 (71-90)          | 2.60 (1.14, 5.95)                   | 87 (75-93)          | 1.95 (0.78, 4.89)                   | 83 (72-90)          | 0.87 (0.37, 2.08)                   | ..                                |
| <b>Alcohol</b>                             |                     | p=0.061                             |                     | p=0.090                             |                     | p=0.11                              |                                   |
| No use                                     | 95 (72-99)          | reference                           | 63 (36-84)          | reference                           | 67 (29-91)          | reference                           | ..                                |
| Daily                                      | 60 (40-77)          | 0.09 (0.01, 0.56)                   | 70 (44-87)          | 1.37 (0.31, 6.13)                   | 72 (49-87)          | 1.27 (0.26, 6.18)                   | ..                                |
| Weekly                                     | 76 (64-86)          | 0.19 (0.03, 1.11)                   | 84 (77-90)          | 3.16 (1.04, 9.63)                   | 84 (74-91)          | 2.66 (0.63, 11.2)                   | ..                                |
| Monthly                                    | 70 (48-85)          | 0.13 (0.02, 0.88)                   | 86 (71-94)          | 3.52 (0.93, 13.3)                   | 92 (78-97)          | 5.64 (1.04, 30.7)                   | ..                                |
| <b>Tobacco</b>                             |                     | p=0.3                               |                     | p=0.2                               |                     | p=0.68                              |                                   |
| Non-smoker                                 | 70 (58-80)          | reference                           | 80 (70-87)          | reference                           | 79 (68-87)          | reference                           | ..                                |
| Casual smoker                              | 62 (36-82)          | 0.69 (0.23, 2.12)                   | 69 (43-87)          | 0.55 (0.18, 1.72)                   | 79 (49-94)          | 1.03 (0.29, 3.57)                   | ..                                |
| Daily smoker                               | 81 (64-91)          | 1.80 (0.67, 4.84)                   | 87 (77-93)          | 1.71 (0.71, 4.09)                   | 92 (83-97)          | 3.24 (1.16, 9.08)                   | ..                                |
| <b>Cannabis</b>                            |                     | p=0.023                             |                     | p=0.010                             |                     | p=0.9                               |                                   |
| No use                                     | 59 (45-72)          | reference                           | 70 (59-79)          | reference                           | 84 (74-90)          | reference                           | ..                                |
| Any use                                    | 82 (71-90)          | 3.22 (1.36, 7.63)                   | 91 (84-95)          | 3.86 (1.37, 10.8)                   | 83 (70-91)          | 0.94 (0.39, 2.26)                   | ..                                |
| <b>Other illicit drugs<sup>b</sup></b>     |                     | p=0.019                             |                     | p= 0.002                            |                     | p=0.7                               |                                   |
| No use                                     | 66 (55-75)          | reference                           | 75 (67-82)          | reference                           | 83 (75-88)          | reference                           | ..                                |
| Any use                                    | 90 (72-97)          | 4.86 (1.28, 18.4)                   | 93 (85-97)          | 4.36 (1.67, 11.4)                   | 87 (60-96)          | 1.35 (0.32, 5.70)                   | ..                                |

- Multivariable model includes year, age and number of sex partners; p value from Wald test;
- Median age of the proportion tested for HIV;
- In 2007 questions about drugs were only asked to people between 15 to 69 years.
- Combines use of ecstasy, cocaine, or heroin

Abbreviations: CI, confidence interval; IQR, interquartile range; m, months; OR, odds ratio; SFr, Swiss Francs; yrs, years; .., variable not included in multivariable model.

Table S16. Lifetime HIV testing, women reporting any same-sex partner, 2007, 2012, 2017. Associations with sociodemographic factors, sexual behaviours and substance use from univariable logistic regression

| HIV testing                                | 2007                |                        | 2012                |                        | 2017                |                        | Adjusted OR (95% CI) <sup>a</sup> |
|--------------------------------------------|---------------------|------------------------|---------------------|------------------------|---------------------|------------------------|-----------------------------------|
|                                            | Prevalence (95% CI) | Unadjusted OR (95% CI) | Prevalence (95% CI) | Unadjusted OR (95% CI) | Prevalence (95% CI) | Unadjusted OR (95% CI) |                                   |
| <b>Year</b>                                |                     |                        |                     |                        |                     |                        | p=0.5                             |
| 2007                                       |                     |                        |                     |                        |                     |                        | reference                         |
| 2012                                       |                     |                        |                     |                        |                     |                        | 1.35 (0.82, 2.23)                 |
| 2017                                       |                     |                        |                     |                        |                     |                        | 1.31 (0.74, 2.30)                 |
| <b>Age</b>                                 |                     | p=0.020                |                     | p=0.7                  |                     | p=0.8                  | p=0.9                             |
| Median age (years) (IQR)                   | 36 (26-45)          | 0.96 (0.93, 0.99)      | 34(29-45)           | 0.99 (0.97, 1.02)      | 33 (26-44)          | 1.01 (0.97, 1.04)      | 1 (0.98, 1.02)                    |
| 16-24                                      | 70 (38-90)          | -                      | 48 (32-65)          | -                      | 59 (37-77)          | -                      | -                                 |
| 25-34                                      | 70 (54-83)          | -                      | 82 (69-90)          | -                      | 67 (51-80)          | -                      | -                                 |
| 35-44                                      | 71 (55-83)          | -                      | 79 (64-89)          | -                      | 88 (68-96)          | -                      | -                                 |
| 45-54                                      | 51 (33-68)          | -                      | 68 (52-81)          | -                      | 75 (55-88)          | -                      | -                                 |
| 55-64                                      | 25 (09-54)          | -                      | 63 (31-87)          | -                      | 45 (05-93)          | -                      | -                                 |
| <b>Region</b>                              |                     |                        |                     | p=0.5                  |                     | p=0.3                  |                                   |
| Lake Geneva                                | 60 (43-76)          | reference              | 68 (52-80)          | reference              | 71 (53-84)          | reference              | ..                                |
| Midland                                    | 64 (45-80)          | 1.14 (0.41, 3.21)      | 77 (59-88)          | 1.58 (0.57, 4.41)      | 64 (46-80)          | 0.74 (0.26, 2.12)      | ..                                |
| Northwest                                  | 63 (40-82)          | 1.10 (0.35, 3.41)      | 57 (41-72)          | 0.64 (0.26, 1.58)      | 56 (28-81)          | 0.53 (0.14, 2.01)      | ..                                |
| Zurich                                     | 54 (35-72)          | 0.77 (0.28, 2.09)      | 71 (52-85)          | 1.18 (0.42, 3.31)      | 80 (55-93)          | 1.69 (0.43, 6.57)      | ..                                |
| East                                       | 73 (38-94)          | 1.73 (0.37, 8.12)      | 79 (52-93)          | 1.79 (0.46, 6.94)      | 62 (29-87)          | 0.68 (0.15, 2.99)      | ..                                |
| Central                                    | 67 (29-93)          | 1.31 (0.26, 6.57)      | 78 (59-89)          | 1.66 (0.57, 4.84)      | 81 (55-94)          | 1.74 (0.45, 6.77)      | ..                                |
| Ticino                                     | 43 (0-100)          | 0.48 (0.04, 5.85)      | 75 (41-93)          | 1.43 (0.32, 6.37)      | 37(10-76)           | 0.24 (0.05, 1.22)      | ..                                |
| <b>Education level</b>                     |                     | p=0.2                  |                     | p=0.5                  |                     | =0.3                   |                                   |
| No school/primary                          | 30 (04-84)          | reference              | 56 (31-78)          | reference              | 68 (34-90)          | reference              | ..                                |
| Secondary                                  | 65 (54-75)          | 4.28 (0.87, 21.0)      | 69 (59-78)          | 1.78 (0.64, 4.93)      | 67 (53-78)          | 0.92 (0.26, 3.28)      | ..                                |
| Tertiary                                   | 57 (43-70)          | 3.03 (0.59, 15.5)      | 76 (64-84)          | 2.46 (0.85, 7.07)      | 71 (57-81)          | 1.11 (0.30, 4.07)      | ..                                |
| <b>Income, SFr</b>                         |                     | p=0.5                  |                     | p=0.7                  |                     | p=0.3                  |                                   |
| No Income                                  | 80 (39-96)          | 2.38 (0.47, 12.1)      | 86 (48-98)          | 3.48 (0.68, 17.8)      | 60 (13-94)          | 0.9 (0.17, 4.83)       | ..                                |
| <4500                                      | 62 (50-73)          | reference              | 64 (55-72)          | reference              | 63 (51-73)          | reference              | ..                                |
| 4500-6000                                  | 56 (35-75)          | 0.78 (0.30, 2.04)      | 64 (43-80)          | 1.00 (0.41, 2.43)      | 67 (44-84)          | 1.19 (0.44, 3.22)      | ..                                |
| >6000                                      | 51 (26-76)          | 0.63 (0.20, 1.94)      | 91 (75-97)          | 5.69 (1.69, 19.2)      | 93 (75-98)          | 7.84 (1.88, 32.8)      | ..                                |
| <b>Marital Status</b>                      |                     | p=0.7                  |                     | p=0.2                  |                     | p=0.9                  |                                   |
| Single                                     | 63 (51-74)          | 1.05 (0.46, 2.41)      | 73 (63-81)          | 1.48 (0.73, 2.96)      | 71 (60-80)          | 2.57 (0.87, 7.54)      | ..                                |
| Married                                    | 62 (45-76)          | reference              | 64 (51-76)          | reference              | 49 (24-74)          | reference              | ..                                |
| Widowed                                    | 29 (0-80)           | 0.26 (0.02, 3.21)      | 76 (35-100)         | 1.74 (0.17, 17.5)      | 45 (0-100)          | 0.86 (0.04, 16.6)      | ..                                |
| Divorced                                   | 56 (35-75)          | 0.78 (0.27, 2.26)      | 71 (51-86)          | 1.26 (0.43, 3.64)      | 63 (21-92)          | 1.81 (0.35, 9.35)      | ..                                |
| <b>Age first sexual intercourse, years</b> |                     | p=0.4                  |                     | p=0.014                |                     | p<0.001                |                                   |
| Median (IQR) <sup>b</sup>                  | 17 (15-18)          | 0.95 (0.84, 1.06)      | 16 (15-18)          | 0.86 (0.76, 0.97)      | 16 (15-18)          | 0.76 (0.64, 0.89)      | ..                                |
| <b>Sex partners 12m</b>                    |                     | p=0.3                  |                     | p=0.3                  |                     | p<0.001                | p=0.026                           |
| 1                                          | 61 (51-71)          | reference              | 68 (60-75)          | reference              | 66 (54-76)          | reference              | reference                         |
| 2-4                                        | 70 (48-86)          | 1.47 (0.55, 3.95)      | 80 (63-91)          | 1.92 (0.77, 4.80)      | 79 (60-91)          | 2 (0.73, 5.52)         | 1.79 (1.01, 3.17)                 |
| 5+                                         | 87 (31-99)          | 4.32 (0.50, 37.3)      | 83 (27-99)          | 2.37 (0.29, 19.5)      | 100                 | -                      | 4.65 (1.02, 21.1)                 |
| <b>Condom use last intercourse</b>         |                     | p=0.4                  |                     | p=0.9                  |                     | p=0.8                  | ..                                |
| Not used                                   | 59 (49-68)          | reference              | 70 (62-77)          | reference              | 68 (58-77)          | reference              | ..                                |
| Used                                       | 70 (52-83)          | 1.64 (0.70, 3.84)      | 70 (56-81)          | 0.99 (0.49, 2.03)      | 70 (51-84)          | 1.12 (0.46, 2.72)      | ..                                |
| <b>Alcohol</b>                             |                     | p >0.9                 |                     | p=0.4                  |                     | p<0.001                | ..                                |
| No use                                     | 66 (36-88)          | reference              | 55 (32-76)          | reference              | 95 (83-99)          | reference              | ..                                |
| Daily                                      | 61 (33-83)          | 0.79 (0.16, 3.77)      | 64 (35-85)          | 1.44 (0.35, 5.89)      | 46 (11-87)          | 0.05 (0.01, 0.31)      | ..                                |
| Weekly                                     | 60 (48-71)          | 0.75 (0.22, 2.60)      | 72 (63-80)          | 2.13 (0.78, 5.80)      | 71 (60-81)          | 0.13 (0.03, 0.52)      | ..                                |
| Monthly                                    | 62 (44-77)          | 0.82 (0.22, 3.12)      | 74 (60-84)          | 2.30 (0.78, 6.81)      | 54 (36-71)          | 0.06 (0.01, 0.27)      | ..                                |
| <b>Tobacco</b>                             |                     | p=0.4                  |                     | p=0.6                  |                     | p= 0.5                 | ..                                |
| Non-smoker                                 | 60 (47-71)          | reference              | 68 (58-77)          | reference              | 67 (54-78)          | reference              | ..                                |
| Casual smoker                              | 48 (23-73)          | 0.61 (0.20, 1.86)      | 67 (49-81)          | 0.41, 2.21             | 80 (50-94)          | 1.96 (0.58, 6.63)      | ..                                |
| Daily smoker                               | 66 (51-78)          | 1.27 (0.58, 2.76)      | 75 (63-85)          | 0.68, 2.97             | 68 (53-80)          | 1.04 (0.46, 2.35)      | ..                                |
| <b>Cannabis<sup>c</sup></b>                |                     | p=0.11                 |                     | p=0.001                |                     | p<0.001                | ..                                |
| No use                                     | 50 (37-63)          | reference              | 53 (40-66)          | reference              | 51 (37-64)          | reference              | ..                                |
| Any use                                    | 70 (57-80)          | 2.31 (1.06, 5.06)      | 78 (69-84)          | 3.04 (1.54, 5.97)      | 82 (71-90)          | 4.46 (1.92, 10.4)      | ..                                |
| <b>Other illicit drugs<sup>d</sup></b>     |                     | p=0.3                  |                     | p=0.13                 |                     | p=0.2                  | ..                                |
| No use                                     | 59 (49-68)          | reference              | 67 (59-74)          | reference              | 65 (55-74)          | reference              | ..                                |

|         |            |                   |            |                   |            |                   |    |
|---------|------------|-------------------|------------|-------------------|------------|-------------------|----|
| Any use | 69 (50-83) | 1.55 (0.65, 3.69) | 81 (63-92) | 2.09 (0.79, 5.53) | 80 (58-93) | 2.21 (0.71, 6.89) | .. |
|---------|------------|-------------------|------------|-------------------|------------|-------------------|----|

e. Multivariable model includes age, and number of sex partners; p value from Wald test;

f. Median age of the proportion tested for HIV;

g. In 2007 questions about drugs were only asked to people between 15 to 69 years;

h. Combines use of ecstasy, cocaine, or heroin and combines categories of use more than 12 months ago and use within last 12 months.

Abbreviations: CI, confidence interval; IQR, interquartile range; m, months; OR, odds ratio; SFr, Swiss Francs; yrs, years; .., variable not included in multivariable model.
